# Supplementary material
Source: publisher figshare collection journal article supplement (https://plos.figshare.com/articles/dataset/_/955406)
Supplement: Supplementary file [file 1]

**Design, recruitment, and baseline characteristics of a prospective cohort study to understand racial HIV/STI disparities among black and white men who have sex with men in Atlanta, Georgia**

Sullivan PS, et al.

**Online supplement 1: Baseline survey instrument**

This supplement contains the survey instrument for the baseline visit of the *InvolveMENT* study. The survey may be broadly broken into two sections: participant-specific and sexual partnership and network questions. The latter section contains questions about partners in aggregate, as well as partner-by-partner dyadic questions for the most recent 5 partners in the previous 6 months. Skip patterns are indicated where appropriate and the document also includes a number of data dictionary elements, such as variable names and coded values.

Please note that the correct pagination is indicated by the page numbers at the bottom center of each page. Additionally, the question numbers are non-sequential and should be ignored.

Correspondence regarding questionnaire content should be addressed to Patrick Sullivan ([pssulli@emory.edu](mailto:pssulli@emory.edu)) or Eli Rosenberg ([esrose2@emory.edu](mailto:esrose2@emory.edu)).

=====

involveMENT - Baseline survey – **Participant-specific questions**

=====

**Contents**

Demographic information

- Education and employment
- Income
- Race and sexual orientation
- Living situation
- Healthcare
- Arrest and incarceration

Substances

- Alcohol use and abuse (CAGE)
- Drug use and types
- Drug abuse screening test
- Substance use treatment

Circumcision

Harm reduction scales

Condoms

- Attitudes (Kalichman et al), and venue attendance
- Usage beliefs scale
- Norms (Peterson et al)
- Errors scale (Grimley et al)
- Condom skills for insertive sex scale

HIV

- Knowledge
- Testing
  - Testing history & results
  - Details of last test
- Care
  - Usual sources for HIV care
  - HIV treatment history

Perceived neighborhood scale (physical, social, services)

Perceptions of local stigma and local community (belongingness)

Resiliency

Racism and Life Experience

Depression

- BDI
- CESD

Sexual abuse (childhood and adulthood)

## **Contents**

### Partner metadata

- Partner genders, numbers, exchange sex
- Male partner metadata screen 2 (internet and sex acts)
- Male partner metadata screen 3 (UAI)
  
- Partner name list
- Partner calendar
- Concurrency clarification questions – if calendar indicates temporal ambiguities

### Partner-specific section – *repeated for each recent sex partner named, up to 5*

#### Beginning of partnership

- Partner demographics
- Partnership description
- Geography
- Disclosure of status
- Serosorting intent

#### Partnership timing

- Date of first sex
- Date of last sex
- Ongoing relationship

#### Ongoing partnership questions

- Transgender partner anatomy
- Sex frequency in p6m
- Sexual agreements
- Sexual activity outside of this relationship
- Group sex
- STD diagnosis and treatment in p6m

#### Last sex

- Sexual activities
- Circumstances (location, drugs, HIV status)
- Last sex – HIV status knowledge
- HIV status knowledge source
- Strategic positioning

### Post partner-specific wrap up

- Relationships among partners (transitivity)
- PrEP Usage
- Final screen

# involve[men]t - Baseline survey

---

## Staff login

---

InvolveMENT Staff:

Please log the participant in for his BASELINE visit by putting his full 7-digit study ID in the boxes below, including the dashes.

1. Study ID: (Required)

2. Repeat Study ID: (Required)

Key

Variable code names for SAS

Skip Patterns (#=question #)

Other skip pattern info

Hidden Question (participant does not see)

# = Question # for sections 2, 3

Format Name

# Introduction

---

We're glad you're going to complete our survey today.

Helpful tips:

Questions marked with    are required questions that you must answer to move forward.

This is a forward-only survey. Proceed to the next page by clicking the "Next Page" button.

Please don't use the back button on your browser as this may cause problems with your survey.

Your privacy is important to us! All information you provide today in this survey will be held confidentially.

# Education and Employment

5. What is the highest level in school that you completed?

- 1 College, post graduate, or professional school
- 2 Some college, Associate's degree, and/or Technical school
- 3 High school or GED
- 4 Some high school
- 5 Less than high school
- 6 Never attended school
- 9 Don't Know

**educ**

**educ.**

6. Have you had a paid job before?

- 1 Yes If yes, go to #7, #9, #10
- 0 No If no, go to #8, #10
- 7 Prefer not to answer If prefer, #7, #10

**paid\_work\_before:**

**Binary\_prefernot.**

7. How would you describe you current work situation?  
(Check all that apply)

shown if Question #6= 1 or 7

- ☐ Full time paid job (>30 hours/week)
- ☐ Part time paid job (<30 hours/week)
- ☐ Home duties/child care
- ☐ Full time student Check = 1
- ☐ Part time student Unchecked = 0
- ☐ Voluntary/charitable work
- ☐ Have a job, but not at work due to extended illness, family leave, furlough or strike
- ☐ Disabled
- ☐ Unemployed for less than one year
- ☐ Unemployed for more than one year

**paid\_fulltime**  
**paid\_parttime**  
**paid\_home**  
**paid\_fullstu**  
**paid\_partstu**  
**paid\_vol**

**Binary\_prefernot.**

**paid\_ill**

**paid\_disable**  
**paid\_nojob\_less12m**  
**paid\_nojob\_more12m**

8. How would you describe you current work situation?  
(Check all that apply)

- ☐ Home duties/child care
- ☐ Full time student Check = 1
- ☐ Part time student Unchecked = 0
- ☐ Voluntary/charitable work
- ☐ Disabled
- ☐ Unemployed for less than one year
- ☐ Unemployed for more than one year

**nopay\_home**  
**nopay\_fullstu**  
**nopay\_partstu**  
**nopay\_vol**  
**nopay\_disable**  
**nopay\_nojob\_less1yr**  
**nopay\_nojob\_more1yr**

show #8 if  
paid\_work\_before=no, prefer  
not to answer

**Binary\_prefernot.**

For Q 7 and 8: Output will be checked="1" (yes) and unchecked="0" (no). Binary variable.

9. What kind of work do you do at your main job?

*work\_type*

If you do not currently have paid work, what kind of work did you do at your last main job?

10. Do you make money from the underground economy (e.g., scams, numbers, drug dealing, prostitution )?

1 Yes  
0 No

Skip to #11

Binary\_prefernot.

*under\_econ*

shown if under\_econ (#10) = 1

11. Briefly describe:

*under\_econ\_desc*

QUESTION INACTIVE

# Income

---

13. What was your household income last year from all sources before taxes?

(monthly / yearly)

- 00 0 to \$417 (monthly) / 0 to \$4,999 (yearly)
- 01 \$418 to \$833 (monthly) / \$5,000 to \$9,999 (yearly)
- 02 \$834 to \$1250 (monthly) / \$10,000 to \$14,999 (yearly)
- 03 \$1251 to \$1667 (monthly) / \$15,000 to \$19,999 (yearly)
- 04 \$1668 to \$2500 (monthly) / \$20,000 to \$29,999 (yearly)
- 05 \$2501 to \$3333 (monthly) / \$30,000 to \$39,999 (yearly)
- 06 \$3334 to \$4167 (monthly) / \$40,000 to \$49,999 (yearly)
- 07 \$4168 to \$6250 (monthly) / \$50,000 to \$74,999 (yearly)
- 08 \$6251 or more (monthly) / \$75,000 or more (yearly)
- 99 Don't know

*Income*

*income.*

14. Including yourself, how many people depended on this income? (must be at least 1)

*dependent*



## Race and Sexual Orientation

---

Please tell us a little bit about yourself.

15. Do you think of yourself as:

- 1 Heterosexual or "Straight"
- 2 Homosexual, Gay
- 3 Bisexual
- 4 Other

orient.

orient

orient\_other

16. There are different ways of referring to guys we know who have sex with men. We want to respect your preferences. During this survey, how would you like us to refer to men who have sex with other men? Please pick one of these choices:

- Gay men
- Gay/bi men
- Same gender loving men
- Two-spirited men
- Queer men

callem

## Living Situation

---

17. Do you rent, own or stay at the place you rest at night?

- 1 Rent
- 2 Own
- 3 Stay for nightly or monthly rate
- 4 Stay for free
- 5 Don't know

living

living.

18. How long have you lived or stayed at the place you rest at night?

- 1 Less than one year
- 2 1-3 years
- 3 4-6 years
- 4 7-10 years
- 5 More than 10 years

living\_duration

living\_duration

19. What is the zip code for the place you stay at night?

zipcode

20. In the past 12 months, have you been homeless at any time? By homeless, I mean you were living on the street, in a shelter, a Single Room Occupancy hotel (SRO), temporarily staying with friends or relatives, or living in a car?

- 1 Yes
- 0 No
- 9 Don't know

homeless

Binary\_prefernot.

21. Are you currently homeless?

- 1 Yes
- 0 No
- 9 Don't know

homeless\_now

Binary\_prefernot.

# Healthcare

22. Do you currently have health insurance? (This includes Medicare or Medicaid)

- 1 Yes if yes, then #23 insurance Binary\_prefernot.
- 0 No if no, then #24
- 9 Don't Know

23. What kind of health insurance or coverage do you currently have?

- 1 Private health insurance or HMO insurance\_type.
- 2 Medicaid
- 3 Medicare
- 4 TRICARE (CHAMPUS) insurance\_type
- 5 Veterans Administration Coverage
- 6 Some other insurance, please specify: insurance\_other
- 7 Don't know

24. Do you know where to go to be seen by a doctor, nurse or healthcare provider if you are sick?

- 4 Always
- 3 Most of the time healthwhere
- 2 Sometimes
- 1 Not often health\_where.
- 0 Never
- 7 Don't know

25. Where do you primarily receive healthcare?

- 1 Healthcare provider office healthprimary health\_primary.
- 2 Community clinic or health center
- 3 Hospital
- 4 Prison clinic
- 5 Commercial storefront clinic (ex. CVS, RiteAid, Walgreen's clinic)
- 6 Community-based organization
- 7 School clinic
- 8 Worksite health clinic
- 10 Local health department
- 9 Other healthprimary\_other

26. In the past 12 months, approximately how many times have you been treated for an illness or a condition by a healthcare provider?

- 0 0 times
- 1 1-4 times
- 2 5-9 times times\_treated
- 3 10 times or more
- 7 Don't Know times\_treated.

27. How often do you have enough money to pay for your prescription drugs?

- 4 Always
- 3 Most often
- 2 Sometimes
- 1 Not often
- 0 Never
- 7 I don't need to buy prescription drugs at this time

money4meds

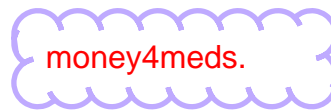

28. How often do you have enough money to pay for healthcare provider office visits?

- 4 Always
- 3 Most often
- 2 Sometimes
- 1 Not often
- 0 Never
- 7 Don't Know

money4health

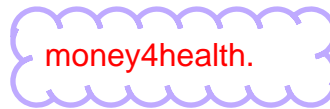

## Arrest and Incarceration

---

29. Have you ever been arrested?

- 1 Yes If yes, then #30  
 0 No If no, then #34

arrested\_ever

Binary\_prefernot.

30. In the past 12 months have you been arrested?

- 1 Yes If yes, then #31, #32  
 0 No If no, then #34

arrested\_p12m

Binary\_prefernot.

31. How many days did you spend in jail or prison the last time you were held?

- 1 Under 30 days  
 2 Over 30 Days  
 9 Don't know

arrested\_jaildays

arrested\_jaildays.

32. The last time you were held in jail or prison did you get a test for HIV?

- 1 Yes  
 0 No If no, then #34  
 9 Don't know

arrested\_jailtest

Binary\_prefernot.

33. Did you get the results of that HIV test?

- 1 Yes arrested\_jailresults  
 0 No  
 9 Don't know

Binary\_prefernot.

# Alcohol use and abuse (CAGE)

34. During the past 12 months, have you had at least one drink of any alcoholic beverage such as beer, wine, a malt beverage or liquor?

1

Yes

If yes, then #35

0

No

If no, then #36

drink\_p12m

Binary\_prefernot.

35. Please check the one response to each item that best describes how you have felt and behaved over your whole life

|                                                                                                                   |              | Yes                   | No                    |
|-------------------------------------------------------------------------------------------------------------------|--------------|-----------------------|-----------------------|
| Have you ever felt you should cut down on your drinking?                                                          | drink_cut    | <input type="radio"/> | <input type="radio"/> |
| Have people annoyed you by criticizing your drinking?                                                             | drink_critic | <input type="radio"/> | <input type="radio"/> |
| Have you ever felt bad or guilty about your drinking?                                                             |              | <input type="radio"/> | <input type="radio"/> |
| Have you ever had a drink first thing in the morning to steady your nerves or get rid of a hangover (eye-opener)? |              | <input type="radio"/> | <input type="radio"/> |

1 0

drink\_guilt

drink\_morning

Binary\_prefernot.

## Drug Use and Types 1

36. In the past 12 months, since [%%1742:month\_11 %%], have you used any non-injection drugs, other than those prescribed for you?

1 Yes  
0 No

If yes, then #37, #38

noninjection

Binary\_prefernot.

37. In the past 12 months, since [%%1742:month\_11 %%], how often did you use the following drugs?

0 1 2 3 4 5 6 7

|                                                     | drugfreq.    | Didn't use            | More than once a day  | Once a day            | More than once a week | Once a week           | More than once a month | Once a month          | Less than once a month |
|-----------------------------------------------------|--------------|-----------------------|-----------------------|-----------------------|-----------------------|-----------------------|------------------------|-----------------------|------------------------|
| Crystal meth (tina, crank, or ice)                  | crystalmeth  | <input type="radio"/> | <input type="radio"/> | <input type="radio"/> | <input type="radio"/> | <input type="radio"/> | <input type="radio"/>  | <input type="radio"/> | <input type="radio"/>  |
| Crack cocaine                                       | crack        | <input type="radio"/> | <input type="radio"/> | <input type="radio"/> | <input type="radio"/> | <input type="radio"/> | <input type="radio"/>  | <input type="radio"/> | <input type="radio"/>  |
| Powered cocaine that is smoked or snorted           | cocaine      | <input type="radio"/> | <input type="radio"/> | <input type="radio"/> | <input type="radio"/> | <input type="radio"/> | <input type="radio"/>  | <input type="radio"/> | <input type="radio"/>  |
| Downers such as Valium, Ativan, or Xanax            | downers      | <input type="radio"/> | <input type="radio"/> | <input type="radio"/> | <input type="radio"/> | <input type="radio"/> | <input type="radio"/>  | <input type="radio"/> | <input type="radio"/>  |
| Painkillers such as Oxycontin, Vicodin, or Percocet | painkillers  | <input type="radio"/> | <input type="radio"/> | <input type="radio"/> | <input type="radio"/> | <input type="radio"/> | <input type="radio"/>  | <input type="radio"/> | <input type="radio"/>  |
| Hallucinogens such as LSD or mushrooms              | hallucinogen | <input type="radio"/> | <input type="radio"/> | <input type="radio"/> | <input type="radio"/> | <input type="radio"/> | <input type="radio"/>  | <input type="radio"/> | <input type="radio"/>  |
| X or Ecstasy                                        | ectasy       | <input type="radio"/> | <input type="radio"/> | <input type="radio"/> | <input type="radio"/> | <input type="radio"/> | <input type="radio"/>  | <input type="radio"/> | <input type="radio"/>  |
| Special K (ketamine)                                | specialk     | <input type="radio"/> | <input type="radio"/> | <input type="radio"/> | <input type="radio"/> | <input type="radio"/> | <input type="radio"/>  | <input type="radio"/> | <input type="radio"/>  |
| GHB                                                 | ghb          | <input type="radio"/> | <input type="radio"/> | <input type="radio"/> | <input type="radio"/> | <input type="radio"/> | <input type="radio"/>  | <input type="radio"/> | <input type="radio"/>  |
| Heroin that is smoked or snorted                    | heroin       | <input type="radio"/> | <input type="radio"/> | <input type="radio"/> | <input type="radio"/> | <input type="radio"/> | <input type="radio"/>  | <input type="radio"/> | <input type="radio"/>  |
| Marijuana                                           | maryjane     | <input type="radio"/> | <input type="radio"/> | <input type="radio"/> | <input type="radio"/> | <input type="radio"/> | <input type="radio"/>  | <input type="radio"/> | <input type="radio"/>  |
| Poppers (amyl nitrate)                              | poppers      | <input type="radio"/> | <input type="radio"/> | <input type="radio"/> | <input type="radio"/> | <input type="radio"/> | <input type="radio"/>  | <input type="radio"/> | <input type="radio"/>  |
|                                                     |              | 0                     | 1                     | 2                     | 3                     | 4                     | 5                      | 6                     | 7                      |

38. In the past 12 months, since [%%1742:month\_11 %%], have you used any other non-injection drugs not listed above?

1 Yes  
0 No

If yes, then #39, 40

noninject\_other

Binary\_prefernot.

39. Specify the non-injection drug you used, other than those listed above:

noninject\_specify

## Drug Use and Types 2

---

40. How often did you use [%%1958:Specify the non %%] ?

- |   |                        |                                                                                                                       |
|---|------------------------|-----------------------------------------------------------------------------------------------------------------------|
| 1 | More than once a day   | <div style="border: 1px solid red; padding: 2px;">noninject_often</div>                                               |
| 2 | Once a day             |                                                                                                                       |
| 3 | More than once a week  | <div style="border: 2px dashed purple; border-radius: 15px; padding: 5px; text-align: center;">noninject_often.</div> |
| 4 | Once a week            |                                                                                                                       |
| 5 | More than once a month |                                                                                                                       |
| 6 | Once a month           |                                                                                                                       |
| 7 | Less than once a month |                                                                                                                       |
| 8 | Refused to answer      |                                                                                                                       |
| 9 |                        |                                                                                                                       |

41. In the past 12 months, since [%%1742:month\_11 %%], have you used Viagra, Levitra or Cialis?

- |   |     |                                                                     |                                                                                                                        |
|---|-----|---------------------------------------------------------------------|------------------------------------------------------------------------------------------------------------------------|
| 1 | Yes | <div style="border: 1px solid red; padding: 2px;">viagra_p12m</div> | <div style="border: 2px dashed purple; border-radius: 15px; padding: 5px; text-align: center;">Binary_prefernot.</div> |
| 0 | No  |                                                                     |                                                                                                                        |

42. In the past 12 months, since [%%1742:month\_11 %%], have you used any drugs that you injected with a needle, other than those prescribed for you?

- |   |     |                                                                |                                                                                                                        |
|---|-----|----------------------------------------------------------------|------------------------------------------------------------------------------------------------------------------------|
| 1 | Yes | <div style="border: 1px solid red; padding: 2px;">inject</div> | <div style="border: 2px dashed purple; border-radius: 15px; padding: 5px; text-align: center;">Binary_prefernot.</div> |
| 0 | No  |                                                                |                                                                                                                        |



<http://www.empathia.com/providers/library/DrugAbuseScreeningTest.pdf>

## Drug abuse screening

43. Please check the one response to each item that best describes how you have felt over the past 12 months (since [%%1742:month\_11 %%])

|                                                                                             |                      | Yes                   | No                    |
|---------------------------------------------------------------------------------------------|----------------------|-----------------------|-----------------------|
| Have you used drugs other than those required for medical reasons?                          | drug_noprescript     | <input type="radio"/> | <input type="radio"/> |
| Have you abused prescription drugs?                                                         | drug_abuse_prescript | <input type="radio"/> | <input type="radio"/> |
| Do you abuse more than one drug at a time?                                                  | drug_multi           | <input type="radio"/> | <input type="radio"/> |
| Can you get through the week without using drugs?                                           | drug_week            | <input type="radio"/> | <input type="radio"/> |
| Are you always able to stop using drugs when you want to?                                   | drug_stop            | <input type="radio"/> | <input type="radio"/> |
| Have you had "blackouts" or "flashbacks" as a result of drug use?                           | drug_blackout        | <input type="radio"/> | <input type="radio"/> |
| Do you ever feel bad or guilty about your drug use?                                         | drug_guilt           | <input type="radio"/> | <input type="radio"/> |
| Does your partner (or parents) ever complain about your involvement with drugs?             | drug_complain        | <input type="radio"/> | <input type="radio"/> |
| Has drugs created problems between you and people close to you?                             | drug_prob            | <input type="radio"/> | <input type="radio"/> |
| Have you lost friends because of your use of drugs?                                         | drug_friend          | <input type="radio"/> | <input type="radio"/> |
| Have you neglected people close to you because of your use of drugs?                        | drug_neglect         | <input type="radio"/> | <input type="radio"/> |
| Have you been in trouble at work because of your use of drugs?                              | drug_trouble         | <input type="radio"/> | <input type="radio"/> |
| Have you lost a job because of drug abuse?                                                  | drug_fired           | <input type="radio"/> | <input type="radio"/> |
| Have you gotten into fights when under the influence of drugs?                              | drug_fights          | <input type="radio"/> | <input type="radio"/> |
| Have you engaged in illegal activities in order to obtain drugs?                            | drug_legal           | <input type="radio"/> | <input type="radio"/> |
| Have you been arrested for possession of illegal drugs?                                     | drug_arrest          | <input type="radio"/> | <input type="radio"/> |
| Have you ever experienced withdrawal symptoms (felt sick) when you stopped taking drugs?    | drug_withdrawal      | <input type="radio"/> | <input type="radio"/> |
| Have you had medical problems as a result of your drug use (e.g., memory loss, hepatitis, c | drug_medical         | <input type="radio"/> | <input type="radio"/> |
| Have you gone to anyone for help for a drug problem?                                        | drug_help            | <input type="radio"/> | <input type="radio"/> |
| Have you been involved in a treatment program especially related to drug use?               | drug_program         | <input type="radio"/> | <input type="radio"/> |

Binary\_prefernot.

1 0

## Substance use treatment

---

44. Have you ever participated in an alcohol or drug treatment program?

1 Yes

If yes, then #45

0 No

drug\_alcprogram

Binary\_prefernot.

45. Have you participated in an alcohol or drug treatment program in the past 12 months?

1 Yes

drug\_programp12m

0 No

Binary\_prefernot.

46. In the past 12 months, did you try to get into an alcohol or drug treatment program but were unable to?

1 Yes

drug\_noprogram\_p12m

0 No

Binary\_prefernot.

# Circumcision

47. Is your penis circumcised (cut) or uncircumcised (uncut)?  
Please select one choice.

1

Circumcised (cut)

0

Uncircumcised (uncut)

9

Don't know

circumcised

circumcised.

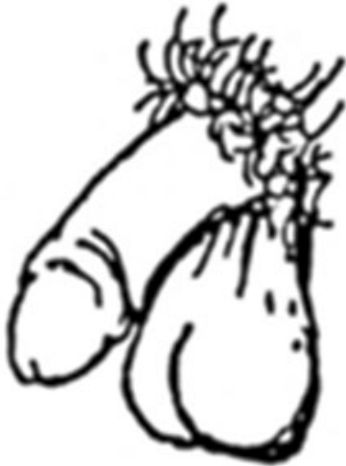

**Circumcised  
(cut)**

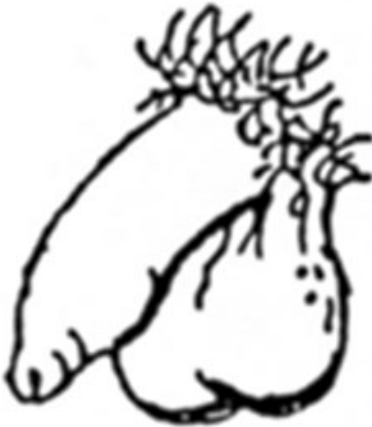

**Uncircumcised  
(uncut)**

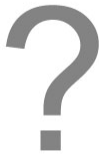

Don't know

# Harm reduction I

[http://journals.lww.com/jaids/Fulltext/2001/12150/Influence\\_of\\_a\\_Partner\\_s\\_HIV\\_Serostatus,\\_Use\\_of.11.aspx](http://journals.lww.com/jaids/Fulltext/2001/12150/Influence_of_a_Partner_s_HIV_Serostatus,_Use_of.11.aspx)  
Suarez at al

60. If my partner tells me his HIV status is the same as mine:

|                                                   |                       |                       |                       |                       |                       |                       |                       |
|---------------------------------------------------|-----------------------|-----------------------|-----------------------|-----------------------|-----------------------|-----------------------|-----------------------|
|                                                   | HR_concordant_unsafe. | Strongly disagree     | Disagree              | Somewhat disagree     | Somewhat agree        | Agree                 | Strongly agree        |
| I am more likely to have unprotected sex with him | HR_concordant_unsafe  | <input type="radio"/> | <input type="radio"/> | <input type="radio"/> | <input type="radio"/> | <input type="radio"/> | <input type="radio"/> |
| Then I worry less about HIV                       | HR_concordant_worry   | <input type="radio"/> | <input type="radio"/> | <input type="radio"/> | <input type="radio"/> | <input type="radio"/> | <input type="radio"/> |
|                                                   | HR_concordant_worry.  | 1                     | 2                     | 3                     | 4                     | 5                     | 6                     |

## Harm Reduction II

[http://journals.lww.com/jaids/Fulltext/2001/12150/Influence\\_of\\_a\\_Partner\\_s\\_HIV\\_Serostatus,\\_Use\\_of.11.aspx](http://journals.lww.com/jaids/Fulltext/2001/12150/Influence_of_a_Partner_s_HIV_Serostatus,_Use_of.11.aspx)  
Suarez et al

48. You have met a man with whom you want to have sex and you don't know his HIV status .

Please rate how safe/unsafe you personally consider each of these sexual practices to be for you. Below are a number of sexual practices and a scale from 1 (completely safe) to 10 (completely risky). Please indicate the number that represents your view of how safe or risky each practice is for your health.

|                                                                                        | Completely<br>safe <br> 1 | 2                     | 3                     | 4                     | 5                     | 6                     | 7                     | 8                     | 9                     | Completely<br>risky <br> 10 |
|----------------------------------------------------------------------------------------|---------------------------|-----------------------|-----------------------|-----------------------|-----------------------|-----------------------|-----------------------|-----------------------|-----------------------|-----------------------------|
| You are the insertive partner during anal intercourse without a condom                 | <input type="radio"/>     | <input type="radio"/> | <input type="radio"/> | <input type="radio"/> | <input type="radio"/> | <input type="radio"/> | <input type="radio"/> | <input type="radio"/> | <input type="radio"/> | <input type="radio"/>       |
| You are the insertive partner during condom-protected anal intercourse                 | <input type="radio"/>     | <input type="radio"/> | <input type="radio"/> | <input type="radio"/> | <input type="radio"/> | <input type="radio"/> | <input type="radio"/> | <input type="radio"/> | <input type="radio"/> | <input type="radio"/>       |
| You are the receptive partner during anal intercourse without a condom                 | <input type="radio"/>     | <input type="radio"/> | <input type="radio"/> | <input type="radio"/> | <input type="radio"/> | <input type="radio"/> | <input type="radio"/> | <input type="radio"/> | <input type="radio"/> | <input type="radio"/>       |
| You are the receptive partner during condom-protected anal intercourse                 | <input type="radio"/>     | <input type="radio"/> | <input type="radio"/> | <input type="radio"/> | <input type="radio"/> | <input type="radio"/> | <input type="radio"/> | <input type="radio"/> | <input type="radio"/> | <input type="radio"/>       |
| You perform oral sex on a partner who cums in your mouth without a condom              | <input type="radio"/>     | <input type="radio"/> | <input type="radio"/> | <input type="radio"/> | <input type="radio"/> | <input type="radio"/> | <input type="radio"/> | <input type="radio"/> | <input type="radio"/> | <input type="radio"/>       |
| You perform oral sex on a partner WHO doesn't cum in your mouth                        | <input type="radio"/>     | <input type="radio"/> | <input type="radio"/> | <input type="radio"/> | <input type="radio"/> | <input type="radio"/> | <input type="radio"/> | <input type="radio"/> | <input type="radio"/> | <input type="radio"/>       |
| Partner performs oral sex on you                                                       | <input type="radio"/>     | <input type="radio"/> | <input type="radio"/> | <input type="radio"/> | <input type="radio"/> | <input type="radio"/> | <input type="radio"/> | <input type="radio"/> | <input type="radio"/> | <input type="radio"/>       |
| You engage in non-penetrative sex (mutual masturbation) until you and your partner cum | <input type="radio"/>     | <input type="radio"/> | <input type="radio"/> | <input type="radio"/> | <input type="radio"/> | <input type="radio"/> | <input type="radio"/> | <input type="radio"/> | <input type="radio"/> | <input type="radio"/>       |

1   2   3   4   5   6   7   8   9   10

HR\_unk\_UIAI

HR\_unk\_PIAI

HR\_unk\_URAI

HR\_unk\_PRAI

HR\_unk\_UOS

HR\_unk\_OS\_nocum

HR\_unk\_ROS

HR\_unk\_mutualmast

harmreduction.

## Harm Reduction III

[http://journals.lww.com/jaids/Fulltext/2001/12150/Influence\\_of\\_a\\_Partner\\_s\\_HIV\\_Serostatus,\\_Use\\_of.11.aspx](http://journals.lww.com/jaids/Fulltext/2001/12150/Influence_of_a_Partner_s_HIV_Serostatus,_Use_of.11.aspx)  
Suarez et al

53. Earlier we asked you some questions about how safe some activities would be with a partner whose HIV status you did not know.

Now, please imagine that you have met a man with whom you want to have sex and he is HIV-negative.

Please rate how safe/unsafe you personally consider each of these sexual practices to be for you.

Below are a number of sexual practices and a scale from 1 (completely safe) to 10 (completely risky). Please indicate the number that represents your view of how safe or risky each practice is for your health.

|                                                                                        | Completely<br>safe <br> 1 | 2                     | 3                     | 4                     | 5                     | 6                     | 7                     | 8                     | 9                     | Completely<br>risky <br> 10 |
|----------------------------------------------------------------------------------------|---------------------------|-----------------------|-----------------------|-----------------------|-----------------------|-----------------------|-----------------------|-----------------------|-----------------------|-----------------------------|
| You are the insertive partner during anal intercourse without a condom                 | <input type="radio"/>     | <input type="radio"/> | <input type="radio"/> | <input type="radio"/> | <input type="radio"/> | <input type="radio"/> | <input type="radio"/> | <input type="radio"/> | <input type="radio"/> | <input type="radio"/>       |
| You are the insertive partner during condom-protected anal intercourse                 | <input type="radio"/>     | <input type="radio"/> | <input type="radio"/> | <input type="radio"/> | <input type="radio"/> | <input type="radio"/> | <input type="radio"/> | <input type="radio"/> | <input type="radio"/> | <input type="radio"/>       |
| You are the receptive partner during anal intercourse without a condom                 | <input type="radio"/>     | <input type="radio"/> | <input type="radio"/> | <input type="radio"/> | <input type="radio"/> | <input type="radio"/> | <input type="radio"/> | <input type="radio"/> | <input type="radio"/> | <input type="radio"/>       |
| You are the receptive partner during condom-protected anal intercourse                 | <input type="radio"/>     | <input type="radio"/> | <input type="radio"/> | <input type="radio"/> | <input type="radio"/> | <input type="radio"/> | <input type="radio"/> | <input type="radio"/> | <input type="radio"/> | <input type="radio"/>       |
| You perform oral sex on a partner who cums in your mouth without a condom              | <input type="radio"/>     | <input type="radio"/> | <input type="radio"/> | <input type="radio"/> | <input type="radio"/> | <input type="radio"/> | <input type="radio"/> | <input type="radio"/> | <input type="radio"/> | <input type="radio"/>       |
| You perform oral sex on a partner who doesn't cum in your mouth                        | <input type="radio"/>     | <input type="radio"/> | <input type="radio"/> | <input type="radio"/> | <input type="radio"/> | <input type="radio"/> | <input type="radio"/> | <input type="radio"/> | <input type="radio"/> | <input type="radio"/>       |
| Partner performs oral sex on you                                                       | <input type="radio"/>     | <input type="radio"/> | <input type="radio"/> | <input type="radio"/> | <input type="radio"/> | <input type="radio"/> | <input type="radio"/> | <input type="radio"/> | <input type="radio"/> | <input type="radio"/>       |
| You engage in non-penetrative sex (mutual masturbation) until you and your partner cum | <input type="radio"/>     | <input type="radio"/> | <input type="radio"/> | <input type="radio"/> | <input type="radio"/> | <input type="radio"/> | <input type="radio"/> | <input type="radio"/> | <input type="radio"/> | <input type="radio"/>       |
|                                                                                        | 1                         | 2                     | 3                     | 4                     | 5                     | 6                     | 7                     | 8                     | 9                     | 10                          |

HR\_neg\_UIAI  
HR\_neg\_PIAI  
HR\_neg\_URAI  
HR\_neg\_PRAI  
HR\_neg\_UOS  
HR\_neg\_OS\_nocum  
HR\_neg\_ROS  
HR\_neg\_mutualmast

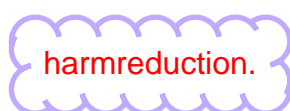

## Harm Reduction IV

[http://journals.lww.com/jaids/Fulltext/2001/12150/Influence\\_of\\_a\\_Partner\\_s\\_HIV\\_Serostatus,\\_Use\\_of.11.aspx](http://journals.lww.com/jaids/Fulltext/2001/12150/Influence_of_a_Partner_s_HIV_Serostatus,_Use_of.11.aspx)  
Suarez et al

58. Earlier we asked you some questions about how safe some sexual activities would be with partners who were HIV-negative or whose HIV status you did not know.

Now the question changes a little.

Now, please imagine that you have met someone with whom you want to have sex and is HIV-positive, but taking antiretroviral medications that reduced his viral load to an undetectable level.

Please rate how safe/unsafe you personally consider each of these sexual practices to be for you.

Below are a number of sexual practices and a scale from 1 (completely safe) to 10 (completely risky). Please indicate the number that represents your view of how safe or risky each practice is for your health.

|                                                                                        | Completely<br>safe <br> 1 | 2                     | 3                     | 4                     | 5                     | 6                     | 7                     | 8                     | 9                     | Completely<br>risky <br> 10 |
|----------------------------------------------------------------------------------------|---------------------------|-----------------------|-----------------------|-----------------------|-----------------------|-----------------------|-----------------------|-----------------------|-----------------------|-----------------------------|
| You are the insertive partner during anal intercourse without a condom                 | <input type="radio"/>     | <input type="radio"/> | <input type="radio"/> | <input type="radio"/> | <input type="radio"/> | <input type="radio"/> | <input type="radio"/> | <input type="radio"/> | <input type="radio"/> | <input type="radio"/>       |
| You are the insertive partner during condom-protected anal intercourse                 | <input type="radio"/>     | <input type="radio"/> | <input type="radio"/> | <input type="radio"/> | <input type="radio"/> | <input type="radio"/> | <input type="radio"/> | <input type="radio"/> | <input type="radio"/> | <input type="radio"/>       |
| You are the receptive partner during anal intercourse without a condom                 | <input type="radio"/>     | <input type="radio"/> | <input type="radio"/> | <input type="radio"/> | <input type="radio"/> | <input type="radio"/> | <input type="radio"/> | <input type="radio"/> | <input type="radio"/> | <input type="radio"/>       |
| You are the receptive partner during condom-protected anal intercourse                 | <input type="radio"/>     | <input type="radio"/> | <input type="radio"/> | <input type="radio"/> | <input type="radio"/> | <input type="radio"/> | <input type="radio"/> | <input type="radio"/> | <input type="radio"/> | <input type="radio"/>       |
| You perform oral sex on a partner who cums in your mouth without a condom              | <input type="radio"/>     | <input type="radio"/> | <input type="radio"/> | <input type="radio"/> | <input type="radio"/> | <input type="radio"/> | <input type="radio"/> | <input type="radio"/> | <input type="radio"/> | <input type="radio"/>       |
| You perform oral sex on a partner who doesn't cum in your mouth                        | <input type="radio"/>     | <input type="radio"/> | <input type="radio"/> | <input type="radio"/> | <input type="radio"/> | <input type="radio"/> | <input type="radio"/> | <input type="radio"/> | <input type="radio"/> | <input type="radio"/>       |
| Partner performs oral sex on you                                                       | <input type="radio"/>     | <input type="radio"/> | <input type="radio"/> | <input type="radio"/> | <input type="radio"/> | <input type="radio"/> | <input type="radio"/> | <input type="radio"/> | <input type="radio"/> | <input type="radio"/>       |
| You engage in non-penetrative sex (mutual masturbation) until you and your partner cum | <input type="radio"/>     | <input type="radio"/> | <input type="radio"/> | <input type="radio"/> | <input type="radio"/> | <input type="radio"/> | <input type="radio"/> | <input type="radio"/> | <input type="radio"/> | <input type="radio"/>       |

1 2 3 4 5 6 7 8 9 10

HR\_pos\_arv\_UIAI  
HR\_pos\_arv\_PIAI  
HR\_pos\_arv\_URAI  
HR\_pos\_arv\_PRAI  
HR\_pos\_arv\_UOS  
HR\_pos\_arv\_OS\_nocum  
HR\_pos\_arv\_ROS  
HR\_pos\_arv\_mutualmast

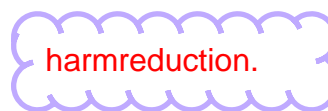

## Harm Reduction V

[http://journals.lww.com/jaids/Fulltext/2001/12150/Influence\\_of\\_a\\_Partner\\_s\\_HIV\\_Serostatus,\\_Use\\_of.11.aspx](http://journals.lww.com/jaids/Fulltext/2001/12150/Influence_of_a_Partner_s_HIV_Serostatus,_Use_of.11.aspx)  
Suarez et al

61. Earlier we asked some questions about how safe you think some sexual activities are with different kinds of partners.

We have one more scenario to ask about.

This time, please imagine that you have met a man with whom you want to have sex and he is HIV-positive and not taking antiretroviral medications.

Please rate how safe/unsafe you personally consider each of these sexual practices to be for you.

Below are a number of sexual practices and a scale from 1 (completely safe) to 10 (completely risky). Please indicate the number that represents your view of how safe or risky each practice is for your health.

|                                                                                        | Completely<br>safe <br> 1 | 2                     | 3                     | 4                     | 5                     | 6                     | 7                     | 8                     | 9                     | Completely<br>risky <br> 10 |
|----------------------------------------------------------------------------------------|---------------------------|-----------------------|-----------------------|-----------------------|-----------------------|-----------------------|-----------------------|-----------------------|-----------------------|-----------------------------|
| You are the insertive partner during anal intercourse without a condom                 | <input type="radio"/>     | <input type="radio"/> | <input type="radio"/> | <input type="radio"/> | <input type="radio"/> | <input type="radio"/> | <input type="radio"/> | <input type="radio"/> | <input type="radio"/> | <input type="radio"/>       |
| You are the insertive partner during condom-protected anal intercourse                 | <input type="radio"/>     | <input type="radio"/> | <input type="radio"/> | <input type="radio"/> | <input type="radio"/> | <input type="radio"/> | <input type="radio"/> | <input type="radio"/> | <input type="radio"/> | <input type="radio"/>       |
| You are the receptive partner during anal intercourse without a condom                 | <input type="radio"/>     | <input type="radio"/> | <input type="radio"/> | <input type="radio"/> | <input type="radio"/> | <input type="radio"/> | <input type="radio"/> | <input type="radio"/> | <input type="radio"/> | <input type="radio"/>       |
| You are the receptive partner during condom-protected anal intercourse                 | <input type="radio"/>     | <input type="radio"/> | <input type="radio"/> | <input type="radio"/> | <input type="radio"/> | <input type="radio"/> | <input type="radio"/> | <input type="radio"/> | <input type="radio"/> | <input type="radio"/>       |
| You perform oral sex on a partner who cums in your mouth without a condom              | <input type="radio"/>     | <input type="radio"/> | <input type="radio"/> | <input type="radio"/> | <input type="radio"/> | <input type="radio"/> | <input type="radio"/> | <input type="radio"/> | <input type="radio"/> | <input type="radio"/>       |
| You perform oral sex on a partner who doesn't cum in your mouth                        | <input type="radio"/>     | <input type="radio"/> | <input type="radio"/> | <input type="radio"/> | <input type="radio"/> | <input type="radio"/> | <input type="radio"/> | <input type="radio"/> | <input type="radio"/> | <input type="radio"/>       |
| Partner performs oral sex on you                                                       | <input type="radio"/>     | <input type="radio"/> | <input type="radio"/> | <input type="radio"/> | <input type="radio"/> | <input type="radio"/> | <input type="radio"/> | <input type="radio"/> | <input type="radio"/> | <input type="radio"/>       |
| You engage in non-penetrative sex (mutual masturbation) until you and your partner cum | <input type="radio"/>     | <input type="radio"/> | <input type="radio"/> | <input type="radio"/> | <input type="radio"/> | <input type="radio"/> | <input type="radio"/> | <input type="radio"/> | <input type="radio"/> | <input type="radio"/>       |
|                                                                                        | 1                         | 2                     | 3                     | 4                     | 5                     | 6                     | 7                     | 8                     | 9                     | 10                          |

HR\_pos\_noarv\_UIAI  
HR\_pos\_noarv\_PIAI  
HR\_pos\_noarv\_URAI  
HR\_pos\_noarv\_PRAI  
HR\_pos\_noarv\_UOS  
HR\_pos\_noarv\_OS\_nocum  
HR\_pos\_noarv\_ROS  
HR\_pos\_noarv\_mutualmast

harmreduction.



## Condom Attitudes, and venue attendance

49. The following statements ask much you agree or disagree with some ideas about condoms.

|                                                   | <center>Strongly<br>disagree<center> | <center><br>Moderately<br>disagree<center> | <center>Slightly<br>disagree<center> | <center>Neutral<center> | <center>Slightly<br>agree<center> | <center><br>Moderately<br>agree<center> | <center>Strongly<br>agree<center> |
|---------------------------------------------------|--------------------------------------|--------------------------------------------|--------------------------------------|-------------------------|-----------------------------------|-----------------------------------------|-----------------------------------|
| The use of condoms can make sex more stimulating  | <input type="radio"/>                | <input type="radio"/>                      | <input type="radio"/>                | <input type="radio"/>   | <input type="radio"/>             | <input type="radio"/>                   | <input type="radio"/>             |
| Condoms can be pleasurable                        | <input type="radio"/>                | <input type="radio"/>                      | <input type="radio"/>                | <input type="radio"/>   | <input type="radio"/>             | <input type="radio"/>                   | <input type="radio"/>             |
| Condoms go against my values or religious beliefs | <input type="radio"/>                | <input type="radio"/>                      | <input type="radio"/>                | <input type="radio"/>   | <input type="radio"/>             | <input type="radio"/>                   | <input type="radio"/>             |

condom\_att\_stimulate  
condom\_att\_pleasure  
condom\_att\_religious

1

2

3

4

5

6

7

Condom\_Attitudes.

50. Which of these websites have you visited in the last month?  
(select all that apply)

- |                                                       |                                     |
|-------------------------------------------------------|-------------------------------------|
| <input type="checkbox"/> MySpace                      | <input type="checkbox"/> Facebook   |
| <input type="checkbox"/> Craigslist                   | <input type="checkbox"/> Adam4Adam  |
| <input type="checkbox"/> Manhunt                      | <input type="checkbox"/> D-list     |
| <input type="checkbox"/> FindFred                     | <input type="checkbox"/> Friendster |
| <input type="checkbox"/> Black Gay Chat / BGCLive.com | <input type="checkbox"/> OKCupid    |

onlinevenue\_myspace  
onlinevenue\_facebook  
onlinevenue\_craigslist  
onlinevenue\_adam4adam  
onlinevenue\_manhunt  
onlinevenue\_dlist  
onlinevenue\_findfred  
onlinevenue\_friendster  
onlinevenue\_BGC  
onlinevenue\_OKC

Binary\_Prefernot

Check = 1  
Unchecked = 0

51. In the last month, in Atlanta, have you visited ...

|                                                                                                                              | No                    | Yes                   |
|------------------------------------------------------------------------------------------------------------------------------|-----------------------|-----------------------|
| ... bars/restaurants such as Joe's on Juniper, Marys, Gilberts, Django, Blake's, BJ Roosters, Burkharths, or Las Margaritas? | <input type="radio"/> | <input type="radio"/> |
| ... gyms such as Gravity, Urban Body Fitness, LA Fitness, or the Colony Square Athletic Club?                                | <input type="radio"/> | <input type="radio"/> |
| ... clubs such as Club Primal, The Jungle, Club Boi?                                                                         | <input type="radio"/> | <input type="radio"/> |
| ... social gatherings such as Atlanta Executive Network, YouthPride, or private parties?                                     | <input type="radio"/> | <input type="radio"/> |
| ... outdoor locations such as Piedmont Park or 10th & Piedmont?                                                              | <input type="radio"/> | <input type="radio"/> |
| ... bath houses such as Manifest, Club Eros, or Flex?                                                                        | <input type="radio"/> | <input type="radio"/> |

realworldvenue\_bar  
realworldvenue\_gym  
realworldvenue\_club  
realworldvenue\_social  
realworldvenue\_outdoor  
realworldvenue\_bath

0

1

Binary\_Prefernot

# Condom usage beliefs

50. The following statements ask how much you approve or disapprove of some ideas about condom use.

|                                                                                | Strongly disapprove   | Disapprove            | Neutral               | Approve               | Strongly approve      |
|--------------------------------------------------------------------------------|-----------------------|-----------------------|-----------------------|-----------------------|-----------------------|
| Abstaining from sexual intercourse if condoms are not used by a new partner    | <input type="radio"/> | <input type="radio"/> | <input type="radio"/> | <input type="radio"/> | <input type="radio"/> |
| Insisting on condom use even if your new partner does not want to use a condom | <input type="radio"/> | <input type="radio"/> | <input type="radio"/> | <input type="radio"/> | <input type="radio"/> |
| Not using a condom during sexual intercourse with a new partner                | <input type="radio"/> | <input type="radio"/> | <input type="radio"/> | <input type="radio"/> | <input type="radio"/> |
|                                                                                | 1                     | 2                     | 3                     | 4                     | 5                     |

condom\_use\_abstain  
condom\_use\_insist  
condom\_use\_nocondom

Condom\_Use.

# Condom norms (Peterson et al)

51. Please choose one answer for each statement.

|                                                                                                               | None of my friends    | Less than half of my friends | About half of my friends | More than half of my friends | All of my friends     |
|---------------------------------------------------------------------------------------------------------------|-----------------------|------------------------------|--------------------------|------------------------------|-----------------------|
| How many of your [%%3194:CALLEMmerged %%] friends always use condoms when having anal sex with a new partner? | <input type="radio"/> | <input type="radio"/>        | <input type="radio"/>    | <input type="radio"/>        | <input type="radio"/> |
| How many of your [%%3194:CALLEMmerged %%] friends think you should avoid unsafe sex?                          | <input type="radio"/> | <input type="radio"/>        | <input type="radio"/>    | <input type="radio"/>        | <input type="radio"/> |
| How many of the [%%3194:CALLEMmerged %%] men you know only engage in safe sex practices?                      | <input type="radio"/> | <input type="radio"/>        | <input type="radio"/>    | <input type="radio"/>        | <input type="radio"/> |
| How may of your [%%3194:CALLEMmerged %%] friends think you should always have safe sex?                       | <input type="radio"/> | <input type="radio"/>        | <input type="radio"/>    | <input type="radio"/>        | <input type="radio"/> |
|                                                                                                               | 1                     | 2                            | 3                        | 4                            | 5                     |

52. How important do your [%%3194:CALLEMmerged %%] friends think it is to use a condom when having anal sex with a new partner?

- 1
- 2
- 3
- 4
- 5
- Not important at all
- Slightly important
- Moderately important
- Very important
- Extremely important

norms\_condom

norms\_avoid

norms\_onlysafe

norms\_yousafe

normal\_PAI\_new

Norms\_PAI.

Norms.

Grimley DM, Annang L, Houser S, Chen H. Prevalence of condom use errors among STD clinic patients. AM J Health Behav. 2005; 29(4): 324-330.

# Condom Errors

54. Have you used a condom in the last 6 months?

- 1 Yes if yes, then #55, #56
- 0 No

condomp6m

Binary\_prefernot.

55. In the last 6 months, when you used a condom, did you:

|                                                              |                   | Yes                   | No                    | Don't Know            |
|--------------------------------------------------------------|-------------------|-----------------------|-----------------------|-----------------------|
| Squeeze air from the tip of condom before putting it on?     | condom_err_air    | <input type="radio"/> | <input type="radio"/> | <input type="radio"/> |
| Experience a condom breaking?                                | condom_err_break  | <input type="radio"/> | <input type="radio"/> | <input type="radio"/> |
| Hold the base of the condom during withdrawal?               | condom_err_base   | <input type="radio"/> | <input type="radio"/> | <input type="radio"/> |
| Leave space at the tip of condom?                            | condom_err_space  | <input type="radio"/> | <input type="radio"/> | <input type="radio"/> |
| Completely unroll the condom before putting it on?           | condom_err_unroll | <input type="radio"/> | <input type="radio"/> | <input type="radio"/> |
| Start having sex, then put the condom on during intercourse? | condom_err_during | <input type="radio"/> | <input type="radio"/> | <input type="radio"/> |
| Put condom on inside out, then flip it over to use?          | condom_err_flip   | <input type="radio"/> | <input type="radio"/> | <input type="radio"/> |
| Re-use a condom?                                             | condom_err_reuse  | <input type="radio"/> | <input type="radio"/> | <input type="radio"/> |
|                                                              |                   | 1                     | 0                     | 9                     |

Binary\_prefernot.

# Condom Skills for Insertive Sex

Complete this section only if: "CONLAST" matches: '1'

a.k.a.: if #54  
(condom6mo)=1(yes), then  
continue to #56

56. In the last 6 months, have you had anal sex as the insertive partner (top) and used a condom?

1 Yes if yes, then #55, #56  
0 No

condom\_err\_analp6m

Binary\_prefernot.

57. During the last six months when you used a condom for anal sex as a "top" did any of the following occur, even once?

| Grimley DM, Annang L, Houser S, Chen H. Prevalence of condom use errors among STD clinic patients. AM J Health Behav. 2005; 29(4): 324-330.                                                                                              | Always                | Very Often            | Sometimes             | Rarely                | Never                 |
|------------------------------------------------------------------------------------------------------------------------------------------------------------------------------------------------------------------------------------------|-----------------------|-----------------------|-----------------------|-----------------------|-----------------------|
| Did you let a condom you were using touch sharp jewelry, fingernails or teeth?                                                                                                                                                           | <input type="radio"/> | <input type="radio"/> | <input type="radio"/> | <input type="radio"/> | <input type="radio"/> |
| Did you put a condom on your penis with the wrong side up and then have to flip it over before you could use it?                                                                                                                         | <input type="radio"/> | <input type="radio"/> | <input type="radio"/> | <input type="radio"/> | <input type="radio"/> |
| Did you completely unroll the condom before putting it on your penis?                                                                                                                                                                    | <input type="radio"/> | <input type="radio"/> | <input type="radio"/> | <input type="radio"/> | <input type="radio"/> |
| Did you hold the tip of the condom to leave a space, then roll it down to the base of your penis?                                                                                                                                        | <input type="radio"/> | <input type="radio"/> | <input type="radio"/> | <input type="radio"/> | <input type="radio"/> |
| Did you use a dry condom? (i.e. the condom was non-lubricated and you did not add any lubricant like KY jelly)                                                                                                                           | <input type="radio"/> | <input type="radio"/> | <input type="radio"/> | <input type="radio"/> | <input type="radio"/> |
| Did you add lubricant to the condom?                                                                                                                                                                                                     | <input type="radio"/> | <input type="radio"/> | <input type="radio"/> | <input type="radio"/> | <input type="radio"/> |
| Did you use an oil-based lubricant such as Vaseline, baby oil, massage oil?                                                                                                                                                              | <input type="radio"/> | <input type="radio"/> | <input type="radio"/> | <input type="radio"/> | <input type="radio"/> |
| Did you have any problems with losing an erection while putting on a condom?                                                                                                                                                             | <input type="radio"/> | <input type="radio"/> | <input type="radio"/> | <input type="radio"/> | <input type="radio"/> |
| Did you have any problems with losing your erection once the condom was on and sex had begun?                                                                                                                                            | <input type="radio"/> | <input type="radio"/> | <input type="radio"/> | <input type="radio"/> | <input type="radio"/> |
| Did you start having sex without a condom and then pull out and put one on?                                                                                                                                                              | <input type="radio"/> | <input type="radio"/> | <input type="radio"/> | <input type="radio"/> | <input type="radio"/> |
| Did you start having sex with a condom on and then take it off before sex was over?                                                                                                                                                      | <input type="radio"/> | <input type="radio"/> | <input type="radio"/> | <input type="radio"/> | <input type="radio"/> |
| Did the condom you were using break during sex?                                                                                                                                                                                          | <input type="radio"/> | <input type="radio"/> | <input type="radio"/> | <input type="radio"/> | <input type="radio"/> |
| Did the condom you were using slip off during sex?                                                                                                                                                                                       | <input type="radio"/> | <input type="radio"/> | <input type="radio"/> | <input type="radio"/> | <input type="radio"/> |
| Did the condom you were using slip-off after sex, as you were pulling out?                                                                                                                                                               | <input type="radio"/> | <input type="radio"/> | <input type="radio"/> | <input type="radio"/> | <input type="radio"/> |
| Did you have a problem with the way a condom fit or felt on you? (for example, you felt it was too small or too large, it was the wrong shape, it caused irritation of your skin or you/your partner couldn't feel anything with it on)? | <input type="radio"/> | <input type="radio"/> | <input type="radio"/> | <input type="radio"/> | <input type="radio"/> |

5 4 3 2 1

con\_IAl\_sharp  
con\_IAl\_flip  
con\_IAl\_unroll  
con\_IAl\_base  
con\_IAl\_dry  
con\_IAl\_lube  
con\_IAl\_oil  
con\_IAl\_edputon  
con\_IAl\_edsex  
con\_IAl\_during  
con\_IAl\_remove  
con\_IAl\_break  
con\_IAl\_slip  
con\_IAl\_pullout  
con\_IAl\_fit

LikertFive.

# HIV Knowledge

Carey, MP., Schroder, KE. Development and psychometric evaluation of the brief HIV knowledge questionnaire. AIDS Educ Prev. 2002; 14(2): 172-182

59. The next set of questions ask about your HIV knowledge. For each statement, please click "True", "False", or "I don't know." If you do not know, please do not guess; instead, please click the button: "I don't know."

|                                                                                                                         | True                  | False                 | Don't Know            |
|-------------------------------------------------------------------------------------------------------------------------|-----------------------|-----------------------|-----------------------|
| Coughing and sneezing DO NOT spread HIV.                                                                                | <input type="radio"/> | <input type="radio"/> | <input type="radio"/> |
| A person can get HIV by sharing a glass of water with someone who has HIV.                                              | <input type="radio"/> | <input type="radio"/> | <input type="radio"/> |
| Pulling out the penis before a man climaxes/cums keeps his partner from getting HIV during sex.                         | <input type="radio"/> | <input type="radio"/> | <input type="radio"/> |
| A woman can get HIV if she has anal sex with a man.                                                                     | <input type="radio"/> | <input type="radio"/> | <input type="radio"/> |
| Showering, or washing one's genitals/private parts, after sex keeps a person from getting HIV.                          | <input type="radio"/> | <input type="radio"/> | <input type="radio"/> |
| All pregnant women infected with HIV will have babies born with AIDS.                                                   | <input type="radio"/> | <input type="radio"/> | <input type="radio"/> |
| People who have been infected with HIV quickly show serious signs of being infected.                                    | <input type="radio"/> | <input type="radio"/> | <input type="radio"/> |
| There is a vaccine that can stop adults from getting HIV.                                                               | <input type="radio"/> | <input type="radio"/> | <input type="radio"/> |
| People are likely to get HIV by deep kissing (putting their tongue in their partner's mouth), if their partner has HIV. | <input type="radio"/> | <input type="radio"/> | <input type="radio"/> |
| A woman cannot get HIV if she has sex during her period.                                                                | <input type="radio"/> | <input type="radio"/> | <input type="radio"/> |
| There is a female condom that can help decrease a woman's chance of getting HIV.                                        | <input type="radio"/> | <input type="radio"/> | <input type="radio"/> |
| A natural skin condom works better against HIV than does a latex condom.                                                | <input type="radio"/> | <input type="radio"/> | <input type="radio"/> |
| A person will NOT get HIV if he is taking antibiotics.                                                                  | <input type="radio"/> | <input type="radio"/> | <input type="radio"/> |
| Having sex with more than one partner can increase a person's chance of becoming infected with HIV.                     | <input type="radio"/> | <input type="radio"/> | <input type="radio"/> |
| Taking a test for HIV one week after having sex will tell a person if she or he has HIV.                                | <input type="radio"/> | <input type="radio"/> | <input type="radio"/> |
| A person can get HIV by sitting in a hot tub or a swimming pool with a person who has HIV.                              | <input type="radio"/> | <input type="radio"/> | <input type="radio"/> |
| A person can get HIV from oral sex.                                                                                     | <input type="radio"/> | <input type="radio"/> | <input type="radio"/> |
| Using Vaseline or baby oil with condoms lowers the chance of getting HIV.                                               | <input type="radio"/> | <input type="radio"/> | <input type="radio"/> |

1 0 9

HIVedu\_sneeze  
HIVedu\_water  
HIVedu\_pullout  
HIVedu\_ladyanal  
HIVedu\_douche  
HIVedu\_pregnant  
HIVedu\_quickkill  
HIVedu\_vaccine  
HIVedu\_french  
HIVedu\_period  
HIVedu\_femalecon  
HIVedu\_skin  
HIVedu\_antibio  
HIVedu\_multiple  
HIVedu\_window  
HIVedu\_hottub  
HIVedu\_oral  
HIVedu\_babyoil

Binary\_tfdk.

## HIV Testing History and Results

62. Have you ever been tested for HIV?

- 1 Yes  
0 No

If yes, then #63, #64, #65, #66

HIVtest\_ever

Binary\_prefernot.

63. In what month and year did you have your most recent HIV test?

Month:

- |           |     |
|-----------|-----|
| January   | =1  |
| February  | =2  |
| March     | =3  |
| April     | =4  |
| May       | =5  |
| June      | =6  |
| July      | =7  |
| August    | =8  |
| September | =9  |
| October   | =10 |
| November  | =11 |
| December  | =12 |

HIVtest\_month

HIVtest\_month.

64. Year:

HIVtest\_year

65. What was the result of your most recent HIV test?

- 0 Negative  
1 Positive  
2 Indeterminant/Inconclusive  
3 Didn't get the results of my last HIV test

HIVtest\_result

HIVtest\_result.

If positive, then hide #67, #70, #71, #72, #73. If positive, then show #68, #69

## Details of Last HIV Test

Complete this section only if: "EVERTEST" matches: '1'

If "ever\_tested" = 1(yes), then show this page

66. When you got tested in [%%1901: %%] [%%1902: %%], where did you get tested?

- 1 Private doctor's office (including HMO)
- 2 Community health center/public health clinic
- 3 HIV counseling and testing site
- 4 HIV/AIDS street outreach program/Mobile Unit
- 5 Hospital (inpatient)
- 6 Emergency room
- 7 Sexually transmitted disease clinic
- 8 Drug treatment program
- 9 Correctional facility (jail or prison)
- 10 Blood bank/Plasma center
- 11 Military
- 12 At home
- 13 Other

HIVtest\_where

HIVtest\_where.

HIVtest\_where\_other

67. How likely is it that you'll get tested for HIV in the next 12 months?

- 1 Very likely
- 2 Somewhat likely
- 3 Somewhat unlikely
- 4 Very unlikely

HIV\_next12mo

HIV\_next12mo.



## Usual Sources of Care for HIV

Complete this section only if: "HRESULT" matches: '1'

68. In the past 12 months, is there one place in particular, like a doctor's office or clinic, where you usually go for most of your HIV care, like CD4 tests, viral load tests, or prescriptions for HIV medicines?

1 Yes

0 No If no, then #69

HIVcare\_oneplace

Binary\_prefernot.

69. What are the reasons you don't have a usual source of care for HIV? [Check all that apply]

- ☐ Couldn't afford a usual source of care
- ☐ Didn't know where to find regular HIV care
- ☐ Couldn't get a regular appointment anywhere
- ☐ No HIV doctors in my area
- ☐ Didn't think it was necessary
- ☐ Thought it was necessary, but never tried to get one
- ☐ Didn't know where to find a regular doctor who speaks the same language as me
- ☐ Have just recently been diagnosed
- ☐ Other (specify)

nocare\_cost  
nocare\_findcare  
nocare\_appt  
nocare\_nodoc  
nocare\_neces  
nocare\_notry

Binary\_prefernot.

Check = 1  
Unchecked = 0

nocare\_language

nocare\_newdiag

Binary\_prefernot.

nocare\_other

# HIV Treatment History

Complete this section only if: "HRESULT" matches: '1'

70. Have you ever taken any antiretroviral medicines to treat your HIV? These medicines are also known as ART, HAART, or the AIDS cocktail.

- 1 Yes if yes, then #72  
0 No if no, then #71

arv\_ever

Binary\_prefernot.

71. What are the reasons you have never taken any antiretroviral medicines?

- ☐ Doctor advised to delay treatment  
☐ Recently into medical care/haven't had time  
☐ CD4 count and/or viral load are good  
☐ Feel good, don't need them  
☐ Worried about side effects  
☐ Drinking or using drugs  
☐ Didn't want to think about being HIV positive  
☐ No money  
☐ No insurance  
☐ Worried about ability to adhere/often forget  
☐ Living on the street  
☐ Taking alternative/complementary medicines  
☐ Don't know  
☐ Other (specify)

noarv\_ever\_doctor  
noarv\_ever\_notime  
noarv\_ever\_cd4\_good  
noarv\_ever\_feelgood  
noarv\_ever\_sidefx  
noarv\_ever\_drugs  
noarv\_ever\_denial  
noarv\_ever\_cost  
noarv\_ever\_noins  
noarv\_ever\_adhere  
noarv\_ever\_homeless  
noarv\_ever\_altmed  
noarv\_ever\_dontknow

Binary\_prefernot.

Check = 1  
Unchecked = 0

noarv\_ever\_other

72. Are you currently taking any antiretroviral medicines to treat your HIV?

- 1 Yes  
0 No if no, then #73

arv\_current

Binary\_prefernot.

73. What are the reasons you aren't currently taking any antiretroviral medicines? [Check all that apply]

- ☐ Doctor advised to delay treatment  
☐ Recently into medical care/haven't had time  
☐ CD4 count and/or viral load are good  
☐ Feel good, don't need them  
☐ Worried about side effects  
☐ Drinking or using drugs  
☐ Didn't want to think about being HIV positive  
☐ No money  
☐ No insurance  
☐ Worried about ability to adhere/often forget  
☐ Living on the street  
☐ Taking alternative/complementary medicines  
☐ Other (specify)

noarv\_now\_doctor  
noarv\_now\_notime  
noarv\_now\_cd4\_good  
noarv\_now\_feelgood  
noarv\_now\_sidefx  
noarv\_now\_drugs  
noarv\_now\_denial  
noarv\_now\_cost  
noarv\_now\_noins  
noarv\_now\_adhere  
noarv\_now\_homeless  
noarv\_now\_altmed

Binary\_prefernot.

Check = 1  
Unchecked = 0

noarv\_now\_other

## Perceived Neighborhood

74. Please rate your neighborhood's physical environment as it is now with the regard to the following:

|                                    |              | Excellent             | Above average         | Average               | Below average         | Poor                  |
|------------------------------------|--------------|-----------------------|-----------------------|-----------------------|-----------------------|-----------------------|
| Affordable and comfortable housing | hood_housing | <input type="radio"/> | <input type="radio"/> | <input type="radio"/> | <input type="radio"/> | <input type="radio"/> |
| Public parks or open spaces        | hood_parks   | <input type="radio"/> | <input type="radio"/> | <input type="radio"/> | <input type="radio"/> | <input type="radio"/> |
| Noise                              | hood_noise   | <input type="radio"/> | <input type="radio"/> | <input type="radio"/> | <input type="radio"/> | <input type="radio"/> |
| Crowdedness                        | hood_crowd   | <input type="radio"/> | <input type="radio"/> | <input type="radio"/> | <input type="radio"/> | <input type="radio"/> |
| Air quality                        | hood_air     | <input type="radio"/> | <input type="radio"/> | <input type="radio"/> | <input type="radio"/> | <input type="radio"/> |
|                                    |              | 1                     | 2                     | 3                     | 4                     | 5                     |

hood.

75. Please rate your neighborhood's social environment as it is now with regard to the following:

|                                                    |                  | Excellent             | Above average         | Average               | Below average         | Poor                  |
|----------------------------------------------------|------------------|-----------------------|-----------------------|-----------------------|-----------------------|-----------------------|
| Friendliness/helpfulness of neighbors              | hood_friendly    | <input type="radio"/> | <input type="radio"/> | <input type="radio"/> | <input type="radio"/> | <input type="radio"/> |
| Residents' attachment to the neighborhood          | hood_attach      | <input type="radio"/> | <input type="radio"/> | <input type="radio"/> | <input type="radio"/> | <input type="radio"/> |
| Self-esteem and morale of the residents            | hood_morale      | <input type="radio"/> | <input type="radio"/> | <input type="radio"/> | <input type="radio"/> | <input type="radio"/> |
| Personal safety                                    | hood_safety      | <input type="radio"/> | <input type="radio"/> | <input type="radio"/> | <input type="radio"/> | <input type="radio"/> |
| Opportunity to participate in local government     | hood_citizenship | <input type="radio"/> | <input type="radio"/> | <input type="radio"/> | <input type="radio"/> | <input type="radio"/> |
| Ability to have access to city councilman/alderman | hood_govaccess   | <input type="radio"/> | <input type="radio"/> | <input type="radio"/> | <input type="radio"/> | <input type="radio"/> |
|                                                    |                  | 1                     | 2                     | 3                     | 4                     | 5                     |

hood.

76. Please rate your neighborhoods' service environment as it is now with regard to the following:

|                                 |                 | Excellent             | Above average         | Average               | Below average         | Poor                  |
|---------------------------------|-----------------|-----------------------|-----------------------|-----------------------|-----------------------|-----------------------|
| Quality of schools              | hood_school     | <input type="radio"/> | <input type="radio"/> | <input type="radio"/> | <input type="radio"/> | <input type="radio"/> |
| Policing                        | hood_police     | <input type="radio"/> | <input type="radio"/> | <input type="radio"/> | <input type="radio"/> | <input type="radio"/> |
| Access to hospital/medical care | hood_healthcare | <input type="radio"/> | <input type="radio"/> | <input type="radio"/> | <input type="radio"/> | <input type="radio"/> |
| Shopping                        | hood_shopping   | <input type="radio"/> | <input type="radio"/> | <input type="radio"/> | <input type="radio"/> | <input type="radio"/> |
| Lighting                        | hood_light      | <input type="radio"/> | <input type="radio"/> | <input type="radio"/> | <input type="radio"/> | <input type="radio"/> |
| Garbage pickup/snow removal     | hood_garbage    | <input type="radio"/> | <input type="radio"/> | <input type="radio"/> | <input type="radio"/> | <input type="radio"/> |
|                                 |                 | 1                     | 2                     | 3                     | 4                     | 5                     |

hood.

## Perceptions of Local Stigma & Local Community Perceptions

77. Please answer each of the following items by checking the box that best fits your response.

|                                                                                                                                    | Strongly disagree     | Disagree              | Neutral               | Agree                 | Strongly agree        | Not Applicable        |
|------------------------------------------------------------------------------------------------------------------------------------|-----------------------|-----------------------|-----------------------|-----------------------|-----------------------|-----------------------|
| Most people in my city/town believe that a [%%3194:CALLEMmerged %%] man is just as trustworthy as the average heterosexual citizen | <input type="radio"/> | <input type="radio"/> | <input type="radio"/> | <input type="radio"/> | <input type="radio"/> | <input type="radio"/> |
| Most employers in my city/town will hire a [%%3194:CALLEMmerged %%] man if he is qualified for the job                             | <input type="radio"/> | <input type="radio"/> | <input type="radio"/> | <input type="radio"/> | <input type="radio"/> | <input type="radio"/> |
| Most people in my city/town feel that homosexuality is a sign of personal failure                                                  | <input type="radio"/> | <input type="radio"/> | <input type="radio"/> | <input type="radio"/> | <input type="radio"/> | <input type="radio"/> |
| Most people in my city/town would not hire a [%%3194:CALLEMmerged %%] man to take care of their children                           | <input type="radio"/> | <input type="radio"/> | <input type="radio"/> | <input type="radio"/> | <input type="radio"/> | <input type="radio"/> |
| Most people in my city/town think less of a person who is [%%3194:CALLEMmerged %%]                                                 | <input type="radio"/> | <input type="radio"/> | <input type="radio"/> | <input type="radio"/> | <input type="radio"/> | <input type="radio"/> |
| Most people in my city/town would treat a [%%3194:CALLEMmerged %%] man just as they would treat anyone                             | <input type="radio"/> | <input type="radio"/> | <input type="radio"/> | <input type="radio"/> | <input type="radio"/> | <input type="radio"/> |
| Most people in my city/town will willingly accept a [%%3194:CALLEMmerged %%] man as a close friend                                 | <input type="radio"/> | <input type="radio"/> | <input type="radio"/> | <input type="radio"/> | <input type="radio"/> | <input type="radio"/> |
|                                                                                                                                    | 1                     | 2                     | 3                     | 4                     | 5                     | 8                     |

78. Please answer each of the following items by checking the box that best fits your response.

|                                                                                                 | Strongly disagree     | Disagree              | Neutral               | Agree                 | Strongly agree        | Not Applicable        |
|-------------------------------------------------------------------------------------------------|-----------------------|-----------------------|-----------------------|-----------------------|-----------------------|-----------------------|
| I feel that I am a member of my city/town gay community                                         | <input type="radio"/> | <input type="radio"/> | <input type="radio"/> | <input type="radio"/> | <input type="radio"/> | <input type="radio"/> |
| I plan to stay in my city/town for a long time                                                  | <input type="radio"/> | <input type="radio"/> | <input type="radio"/> | <input type="radio"/> | <input type="radio"/> | <input type="radio"/> |
| I have many [%%3194:CALLEMmerged %%] male friends in my city/town                               | <input type="radio"/> | <input type="radio"/> | <input type="radio"/> | <input type="radio"/> | <input type="radio"/> | <input type="radio"/> |
| I have many lesbian/bisexual women in my city/town                                              | <input type="radio"/> | <input type="radio"/> | <input type="radio"/> | <input type="radio"/> | <input type="radio"/> | <input type="radio"/> |
| I wish that I could live someplace with a stronger gay/bisexual community than the place I live | <input type="radio"/> | <input type="radio"/> | <input type="radio"/> | <input type="radio"/> | <input type="radio"/> | <input type="radio"/> |
| I regularly attend gay events and meetings in my city/town                                      | <input type="radio"/> | <input type="radio"/> | <input type="radio"/> | <input type="radio"/> | <input type="radio"/> | <input type="radio"/> |
| My town/city is a bad place for me to live as a [%%3194:CALLEMmerged %%] man                    | <input type="radio"/> | <input type="radio"/> | <input type="radio"/> | <input type="radio"/> | <input type="radio"/> | <input type="radio"/> |
| I feel at home in my city/towns' gay community                                                  | <input type="radio"/> | <input type="radio"/> | <input type="radio"/> | <input type="radio"/> | <input type="radio"/> | <input type="radio"/> |
| As a [%%3194:CALLEMmerged %%] man, I enjoy living in my city/town                               | <input type="radio"/> | <input type="radio"/> | <input type="radio"/> | <input type="radio"/> | <input type="radio"/> | <input type="radio"/> |
|                                                                                                 | 1                     | 2                     | 3                     | 4                     | 5                     | 8                     |

Question 77 -Variable Names

comm.

comm\_trust  
comm\_hire  
comm\_failure  
comm\_child  
comm\_opinion  
comm\_treat  
comm\_friend

Question 78 - Var Names

comm.

comm\_member  
comm\_stay  
comm\_gayfriends  
comm\_lesbian  
comm\_bettercom  
comm\_events  
comm\_badplace  
comm\_athome  
comm\_enjoy

# Resiliency

[http://www.resiliencescale.com/en/rstest/rstest\\_14\\_en.html](http://www.resiliencescale.com/en/rstest/rstest_14_en.html)

79. Please check the box indicating how much you disagree or agree with each statement

|                                                                         | Strongly disagree     | Disagree              | Neutral               | Agree                 | Strongly agree        | Not Applicable        |
|-------------------------------------------------------------------------|-----------------------|-----------------------|-----------------------|-----------------------|-----------------------|-----------------------|
| I usually manage one way or another                                     | <input type="radio"/> | <input type="radio"/> | <input type="radio"/> | <input type="radio"/> | <input type="radio"/> | <input type="radio"/> |
| I feel proud that I have accomplished things in my life                 | <input type="radio"/> | <input type="radio"/> | <input type="radio"/> | <input type="radio"/> | <input type="radio"/> | <input type="radio"/> |
| I usually take things in stride                                         | <input type="radio"/> | <input type="radio"/> | <input type="radio"/> | <input type="radio"/> | <input type="radio"/> | <input type="radio"/> |
| I am friends with myself                                                | <input type="radio"/> | <input type="radio"/> | <input type="radio"/> | <input type="radio"/> | <input type="radio"/> | <input type="radio"/> |
| I am determined                                                         | <input type="radio"/> | <input type="radio"/> | <input type="radio"/> | <input type="radio"/> | <input type="radio"/> | <input type="radio"/> |
| I keep interested in things                                             | <input type="radio"/> | <input type="radio"/> | <input type="radio"/> | <input type="radio"/> | <input type="radio"/> | <input type="radio"/> |
| My belief in myself gets me through hard times                          | <input type="radio"/> | <input type="radio"/> | <input type="radio"/> | <input type="radio"/> | <input type="radio"/> | <input type="radio"/> |
| My life has meaning                                                     | <input type="radio"/> | <input type="radio"/> | <input type="radio"/> | <input type="radio"/> | <input type="radio"/> | <input type="radio"/> |
| When I am in a difficult situation, I can usually find my way out of it | <input type="radio"/> | <input type="radio"/> | <input type="radio"/> | <input type="radio"/> | <input type="radio"/> | <input type="radio"/> |
| I have enough energy to do what I have to do                            | <input type="radio"/> | <input type="radio"/> | <input type="radio"/> | <input type="radio"/> | <input type="radio"/> | <input type="radio"/> |
|                                                                         | 1                     | 2                     | 3                     | 4                     | 5                     | NA                    |

res\_manage  
res\_proud  
res\_stride  
res\_selflove  
res\_determined  
res\_interest  
res\_persevere  
res\_meaning  
res\_getout  
res\_energy

resiliency.

# Racism and Life Experience I

80. Please answer each of the following items by checking the box that best fits your response.

In the past 12 months.....

|                                                                                                                                                | Never                 | Rarely                | Sometimes             | Fairly Often          | Very Often            |
|------------------------------------------------------------------------------------------------------------------------------------------------|-----------------------|-----------------------|-----------------------|-----------------------|-----------------------|
| How often have your civil rights been violated (i.e., job or housing discrimination due to racism, racial discrimination, or racial prejudice? | <input type="radio"/> | <input type="radio"/> | <input type="radio"/> | <input type="radio"/> | <input type="radio"/> |
| How often have others said or acted as if you are over-sensitive or paranoid about racism?                                                     | <input type="radio"/> | <input type="radio"/> | <input type="radio"/> | <input type="radio"/> | <input type="radio"/> |
| How often have you witnessed prejudice or discrimination directed at someone else because of their race/ethnic group?                          | <input type="radio"/> | <input type="radio"/> | <input type="radio"/> | <input type="radio"/> | <input type="radio"/> |
| How often have you heard about someone else's experiences of racially-motivated discrimination or prejudice?                                   | <input type="radio"/> | <input type="radio"/> | <input type="radio"/> | <input type="radio"/> | <input type="radio"/> |
| How often have others reacted to you as if they were afraid or intimidated of you because of your race/ethnic group?                           | <input type="radio"/> | <input type="radio"/> | <input type="radio"/> | <input type="radio"/> | <input type="radio"/> |

1 2 3 4 5

racism.

racism\_rights  
racism\_paranoid  
racism\_witness  
racism\_another  
racism\_fear

# Racism and Life Experience II

81. Please answer each of the following items by checking the box that best fits your response.

In the past 12 months.....

|                                                                                                                                  | Never                 | Rarely                | Sometimes             | Fairly Often          | Very Often            | Prefer Not to Answer  |
|----------------------------------------------------------------------------------------------------------------------------------|-----------------------|-----------------------|-----------------------|-----------------------|-----------------------|-----------------------|
| How often have you been observed or followed while in public places because of your race/ethnic group?                           | <input type="radio"/> | <input type="radio"/> | <input type="radio"/> | <input type="radio"/> | <input type="radio"/> | <input type="radio"/> |
| How often have you been treated as if you were "stupid" or "talked down to" because of your race/ethnic group?                   | <input type="radio"/> | <input type="radio"/> | <input type="radio"/> | <input type="radio"/> | <input type="radio"/> | <input type="radio"/> |
| How often have your ideas or opinions been minimized, ignored, or devalued because of your race/ethnic group?                    | <input type="radio"/> | <input type="radio"/> | <input type="radio"/> | <input type="radio"/> | <input type="radio"/> | <input type="radio"/> |
| How often have you heard (or been told) a racially offensive or insensitive comment or joke?                                     | <input type="radio"/> | <input type="radio"/> | <input type="radio"/> | <input type="radio"/> | <input type="radio"/> | <input type="radio"/> |
| How often have you been mistaken for someone who serves others (i.e., janitor, bellboy, maid) because of your race/ethnic group? | <input type="radio"/> | <input type="radio"/> | <input type="radio"/> | <input type="radio"/> | <input type="radio"/> | <input type="radio"/> |
| How often have you been mistaken for someone else of your same race (who may not look like you at all)?                          | <input type="radio"/> | <input type="radio"/> | <input type="radio"/> | <input type="radio"/> | <input type="radio"/> | <input type="radio"/> |
|                                                                                                                                  | 1                     | 2                     | 3                     | 4                     | 5                     | 7                     |

racism\_prefer.

racism\_stared  
racism\_stupid  
racism\_ignored  
racism\_insensitive  
racism\_service  
racism\_mistaken

## BDI-PC

This next section contains groups of statements. Please read each group of statements carefully. Then pick out the one statement in each group which best describes the way you have been feeling the PAST TWO WEEKS, INCLUDING TODAY. Select the box beside the statement you picked. If several statements in the group seem to apply equally well, select each one.

Be sure to read all the statements in each group before making your choice.

82. Describe the way you have been feeling for the past two weeks, including today.

- ☐ I do not feel sad
- ☐ I feel sad
- ☐ I am sad all the time and I can't snap out of it
- ☐ I am so sad or unhappy that I can't stand it

Check = 1

Unchecked = 0

bdi\_sad0  
bdi\_sad1  
bdi\_sad2  
bdi\_sad3

Binary\_prefernot.

83. Describe the way you have been feeling for the past two weeks, including today.

- ☐ I am not particularly discouraged about the future
- ☐ I feel discouraged about the future
- ☐ I feel I have nothing to look forward to
- ☐ I feel the future is hopeless and that things cannot improve

Check = 1

Unchecked = 0

bdi\_future0  
bdi\_future1  
bdi\_future2  
bdi\_future3

Binary\_prefernot.

84. Describe the way you have been feeling for the past two weeks, including today.

- ☐ I do not feel like a failure
- ☐ I feel I have failed more than the average person
- ☐ As I look back on my life, all I can see are a lot of failures
- ☐ I feel I am a complete failure as a person

Check=1

Unchecked=0

bdi\_failure0  
bdi\_failure1  
bdi\_failure2  
bdi\_failure3

Binary\_prefernot.

85. Describe the way you have been feeling for the past two weeks, including today.

- ☐ I get as much satisfaction out of things as I used to
- ☐ I don't enjoy things the way I used to
- ☐ I don't get satisfaction out of things anymore
- ☐ I am dissatisfied or bored with everything

bdi\_satisfaction0  
bdi\_satisfaction1  
bdi\_satisfaction2  
bdi\_satisfaction3

Binary\_prefernot.

Check = 1

Unchecked = 0

86. Describe the way you have been feeling for the past two weeks, including today.

- ☐ I don't feel disappointed in myself
- ☐ I am disappointed in myself
- ☐ I am disgusted in myself
- ☐ I hate myself

Check = 1

Unchecked = 0

bdi\_disappointed0  
bdi\_disappointed1  
bdi\_disappointed2  
bdi\_disappointed3

Binary\_prefernot.

87. Describe the way you have been feeling for the past two weeks, including today.

- ☐ I don't feel I am any worse than anybody else
- ☐ I am critical of myself for my weaknesses or mistakes
- ☐ I blame myself all of the time for my faults
- ☐ I blame myself for everything bad that happens

bdi\_faults0  
bdi\_faults1  
bdi\_faults2  
bdi\_faults3

Binary\_prefernot.

Check = 1

Unchecked = 0



88. Describe the way you have been feeling for the past two weeks, including today.

- ☐ I don't have any thoughts of killing myself
- ☐ I have thoughts of killing myself, but I would not carry them out
- ☐ I would like to kill myself
- ☐ I would kill myself if I had the chance

Check = 1  
Unchecked = 0

bdi\_suicide0  
bdi\_suicide1  
bdi\_suicide2  
bdi\_suicide3

Binary\_prefernot.

# CESD

89. Please choose the answer that best fits how you have felt and behaved during the past week

|                                                       |                  | Rarely or<br>none of the<br>time </br>(<1<br>day) | Some or little<br>of the time </br><br>br>(1-2 days) | Occasionally<br>or a moderate<br>amount of the<br>time </br>(3-4<br>days) | Most or all of<br>the time </br><br>br>(5-7 days) |
|-------------------------------------------------------|------------------|---------------------------------------------------|------------------------------------------------------|---------------------------------------------------------------------------|---------------------------------------------------|
| I was bothered by things that don't usually bother me | cesd_bother      | <input type="radio"/>                             | <input type="radio"/>                                | <input type="radio"/>                                                     | <input type="radio"/>                             |
| I had trouble keeping my mind on what I was doing     | cesd_concentrate | <input type="radio"/>                             | <input type="radio"/>                                | <input type="radio"/>                                                     | <input type="radio"/>                             |
| I felt depressed                                      | cesd_depressed   | <input type="radio"/>                             | <input type="radio"/>                                | <input type="radio"/>                                                     | <input type="radio"/>                             |
| I felt everything I did was an effort                 | cesd_effort      | <input type="radio"/>                             | <input type="radio"/>                                | <input type="radio"/>                                                     | <input type="radio"/>                             |
| I felt hopeful about the future                       | cesd_hopeful     | <input type="radio"/>                             | <input type="radio"/>                                | <input type="radio"/>                                                     | <input type="radio"/>                             |
| I felt fearful                                        | cesd_fearful     | <input type="radio"/>                             | <input type="radio"/>                                | <input type="radio"/>                                                     | <input type="radio"/>                             |
| My sleep was restless                                 | cesd_badsleep    | <input type="radio"/>                             | <input type="radio"/>                                | <input type="radio"/>                                                     | <input type="radio"/>                             |
| I was happy                                           | cesd_happy       | <input type="radio"/>                             | <input type="radio"/>                                | <input type="radio"/>                                                     | <input type="radio"/>                             |
| I felt lonely                                         | cesd_lonely      | <input type="radio"/>                             | <input type="radio"/>                                | <input type="radio"/>                                                     | <input type="radio"/>                             |
| I could not get "going"                               | cesd_getgoing    | <input type="radio"/>                             | <input type="radio"/>                                | <input type="radio"/>                                                     | <input type="radio"/>                             |

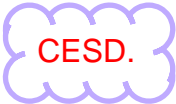

0123

# Sexual Abuse

90. The following questions deal with topics that are often difficult to talk or think about. They are questions about physical and sexual abuse that you may have experienced early in your life. When the question says, “child,” it means when you were age 16 or younger.

|                                                                                    |                       | Yes                   | No                    |
|------------------------------------------------------------------------------------|-----------------------|-----------------------|-----------------------|
| As a child, were you ever beaten, physically attacked, or physically abused?       | abuse_child_physabuse | <input type="radio"/> | <input type="radio"/> |
| As a child, were you ever sexually attacked, raped, or sexually abused?            | abuse_child_sexabuse  | <input type="radio"/> | <input type="radio"/> |
| As an adult, have you ever been beaten, physically attacked, or physically abused? | abuse_adult_physabuse | <input type="radio"/> | <input type="radio"/> |
| As an adult, have you ever been sexually attacked, raped, or sexually abused?      | abuse_adult_sexabuse  | <input type="radio"/> | <input type="radio"/> |
|                                                                                    |                       | 1                     | 0                     |

Binary\_prefernot.

## Open text field to make corrections

---

521. You are almost finished with our survey!

We understand that having a forward-only survey can be frustrating because it does not allow you to make corrections to previous responses.

If you would like to change something that you've told us, please describe the question(s) and what the response(s) should be, using the space below.

survey\_changes



=====

involveMENT - Baseline survey - **sexual partnership and network questions**

=====

**Contents** (repeated for convenience)

Partner metadata

- Partner genders, numbers, exchange sex
- Male partner metadata screen 2 (internet and sex acts)
- Male partner metadata screen 3 (UAI)
  
- Partner name list
- Partner calendar
- Concurrency clarification questions – if calendar indicates temporal ambiguities

Partner-specific section – *repeated for each recent sex partner named, up to 5*

Beginning of partnership

- Partner demographics
- Partnership description
- Geography
- Disclosure of status
- Serosorting intent

Partnership timing

- Date of first sex
- Date of last sex
- Ongoing relationship

Ongoing partnership questions

- Transgender partner anatomy
- Sex frequency in p6m
- Sexual agreements
- Sexual activity outside of this relationship
- Group sex
- STD diagnosis and treatment in p6m

Last sex

- Sexual activities
- Circumstances (location, drugs, HIV status)
- Last sex – HIV status knowledge
- HIV status knowledge source
- Strategic positioning

Post partner-specific wrap up

- Relationships among partners
- PrEP usage

ÁÁÁÁÁÁÁÁÁÁ○ Final screen

=====

Partner genders and numbers – **p12m (Baseline only)**

=====

Thank you for all that you have told us so far. These next questions ask about people you've had sex with during the last 12 months, **since the beginning of [%%1742:month 11 %%]**.

**93** During the last 12 months, did you have sex with a person who was:  
(mark all that apply)

- ☐ Male
- ☐ Female
- ☐ Transgender: male to female
- ☐ Transgender: female to male

Check = 1  
Unchecked = 0

sexp12m\_m  
sexp12m\_f  
sexp12m\_mtf  
sexp12m\_ftm

Binary\_prefernot.

if male, then #94, #95  
if female, then #96, #97  
if trans mtf=#98, #99  
if trans ftm=#100, #101

If 'male':

**94** During the last 12 months, with how many men did you have anal or oral sex?:

male\_howmanyp12m

Were any of these male sex partners an exchange partner -- that is a partner that you have sex with in exchange for money, drugs, food, or something else of value?

- 95**
- 1 ☐ Yes
  - 0 ☐ No
  - 9 ☐ Don't know

male\_exchangep12m

Binary\_prefernot.

If 'female':

**96** During the last 12 months, with how many women did you have vaginal or anal sex?:

female\_howmanyp12m

**97** Were any of these female sex partners an exchange partner -- that is a partner that you have sex with in exchange for money, drugs, food, or something else of value?

- 1 ☐ Yes
- 0 ☐ No
- 9 ☐ Don't know

female\_exchangep12m

Binary\_prefernot.

If 'Transgender: male to female':

**98** During the last 12 months, with how many male to female transgender individuals did you have sex?:

mtf\_howmanyp12m

**99** Were any of these male to female transgender sex partners an exchange partner -- that is a partner that you have sex with in exchange for money, drugs, food, or something else of value?

- 1 ☐ Yes
- 0 ☐ No
- 9 ☐ Don't know

mtf\_exchangep12m

Binary\_prefernot.

If 'Transgender: female to male':

**100** During the last 12 months, with how many female to male transgender individuals did you have sex?:

ftm\_howmanyp12m

**101** Were any of these female to male transgender sex partners an exchange partner -- that is a partner that you have sex with in exchange for money, drugs, food, or something else of value?

- 1 ☐ Yes
- 0 ☐ No
- 9 ☐ Don't know

ftm\_exchangep12m

Binary\_prefernot.

*[if > 0 male partners in p12m. Actually this is always true at Baseline]*

=====

Partner classification and numbers – male partners p12m *(Baseline only)*

=====

**102** Of the [%%45:%%] male partners you had anal or oral sex with in the last 12 months, how many were:  
[ ] main partners? (someone that you feel committed to above all others -- this is someone you might call your boyfriend, significant other, life partner, or husband) **male\_mainp12m**

[ ] casual partners? (someone that you do not feel committed to above all others)

**male\_casualp12m**

*[continuous sum shows total]*

Please ensure that the total number of main + casual partners equals [%%45:During the last %%]. Your current total equals [%%249:total msp %%].

**if male\_totalp12m=0, then #108**

**male\_totalp12m**

=====

Male partner metadata screen 2 – p12m (*Baseline only*)

=====

**103** Of the [%%45:During the last %%] male partners you had anal or oral sex with in the last 12 months, how many did you meet on the Internet?

**male\_internetp12m**

\_\_\_\_\_

The total number of sex partners met on the Internet cannot be more than the total number of male sex partners ([%%45:During the last %%]).

**104** Of the [%%45:During the last %%] male partners you had sex with in the last 12 months, how many did you have anal sex with?

if male\_analp12m (#104)=0, then #108  
if male\_analp12m=>1, skip #107  
if male\_analp12m=1, #107

**male\_Alp12m**

\_\_\_\_\_

**105** Of the [%%45:During the last %%] male partners you had sex with in the last 12 months, how many did you have oral sex with?

**male\_OSp12m**

\_\_\_\_\_

The total number of anal sex partners cannot be more than the total number of male sex partners ([%%45:During the last %%]).



=====

Male partner metadata screen 3 - p12m (*Baseline only*)

=====

*If >1 male AI partner:*

**106** Of your [%%49:Of the [%% %%] partners you had anal sex with in the last 12 months, how many did you have unprotected anal sex with? (This means that you or your partner did not use a condom at any point during sex, at least one time that you had anal sex)

\_\_\_\_\_

males\_UAlp12m

*ERROR: The number of male partners you had unprotected anal sex with can't be more than the total number of anal sex partners ([%%49:Of the [%% %%]).*

*If 1 male AI partner:*

**107** In the last 12 months, did you have unprotected anal sex with your male anal sex partner? (This means that you or your partner did not use a condom at any point during sex, at least one time that you had anal sex)

- 1 ( ) Yes  
0 ( ) No  
9 ( ) Don't know

male\_UAlp12m

Binary\_prefernot.

=====

Transition from p12m to p6m metadata recall (*Baseline only*)

=====

Thank you for telling us about your partners in the last 12 months.

Next, we'd like to ask you about your partners in the last 6 months (since the beginning of XXX).

Some of these questions will be very similar to earlier ones, but please keep in mind that they are now referring to partners you had since the beginning of [XXX]

Click Next Page to continue.

=====

Partner genders and numbers – p6m

=====

**108** During the last 6 months, did you have sex with a person who was:  
(mark all that apply)

- ☐ Male
- ☐ Female
- ☐ Transgender: male to female
- ☐ Transgender: female to male

Check = 1  
Unchecked = 0

sexp6m\_m  
sexp6m\_f  
sexp6m\_mtf  
sexp6m\_ftm

if male=#109, #110  
if female=#111, #112  
if trans mtf=#113, #114  
if trans ftm=#115, 116

Binary\_prefernot.

If 'male':

**109** During the last 6 months, with how many men did you have anal or oral sex?:

male\_howmanyp6m

if 0=#123

**110** Was any of these male sex partners an exchange partner -- that is a partner that you have sex with in exchange for money, drugs, food, or something else of value?

- 1 Yes
- 0 No
- 9 Don't know

male\_exchangep6m

Binary\_prefernot.

[if "yes" selected then all male partner-specific exchange questions are suddenly visible (set default to they are off)]

If 'female':

**111** During the last 6 months, with how many women did you have vaginal or anal sex?:

female\_howmanyp6m

**112** Was any of these female sex partners an exchange partner -- that is a partner that you have sex with in exchange for money, drugs, food, or something else of value?

- 1 Yes
- 0 No
- 9 Don't know

female\_exchangep6m

Binary\_prefernot.

[if "yes" selected then all female partner-specific exchange questions are suddenly visible (set default to they are off)]

If 'Transgender: male to female':

**113** During the last 6 months, with how many male to female transgender individuals did you have sex?:

mtf\_howmanyp6m

**114** Was any of these [%45:During the last %] transgender: male to female sex partners an exchange partner -- that is a partner that you have sex with in exchange for money, drugs, food, or something else of value?

- 1 Yes
- 0 No
- 9 Don't know

mtf\_exchangep6m

Binary\_prefernot.

[if "yes" selected then all transgender: male to female partner-specific exchange questions are suddenly visible (set default to they are off)]

*If 'Transgender: female to male'*

**115** During the last 6 months, with how many female to male transgender individuals did you have sex?:

\_\_\_\_\_ **ftm\_howmanyp6m**

**116** Was any of these [%%45:During the last %%] transgender: female to male sex partners an exchange partner -- that is a partner that you have sex with in exchange for money, drugs, food, or something else of value?

- 1 Yes
- 0 No
- 9 Don't know

**ftm\_exchangep6m**

**Binary\_prefernot.**

*[if "yes" selected then all transgender: female to male partner-specific exchange questions are suddenly visible (set default to they are off)]*

*[if > 0 male partners in p6m]*

=====

Partner classification and numbers – non-transgender male partners p6m

=====

**117** Of the [%%45:%%] male partners you had anal or oral sex with in the last 6 months, how many were:  
[ ] main partners? (someone that you feel committed to above all others -- this is someone you might call your boyfriend, significant other, life partner, or husband) **male\_mainp6m**

[ ] casual partners? (someone that you do not feel committed to above all others.) **male\_casualp6m**

*[continuous sum shows total]*

Please ensure that the total number of main + casual partners equals [%%45:During the last %%]. Your current total equals [%%249:total msp %%].

**male\_totalp6m**

=====

Partner metadata screen 2 – p6m

=====

**118** Of the [%%45:During the last %%] male partners you had anal or oral sex with in the last 6 months, how many did you meet on the Internet?

male\_internetp6m

\_\_\_\_\_

The total number of sex partners met on the Internet cannot be more than the total number of male sex partners ([%%45:During the last %%]).

**119** Of the [%%45:During the last %%] male partners you had sex with in the last 6 months, how many did you have anal sex with?

if #119=0, then #123  
if #119=>1=#121, skip #122  
if #119=1, then #122

male\_Alp6m

\_\_\_\_\_

**120** Of the [%%45:During the last %%] male partners you had sex with in the last 6 months, how many did you have oral sex with?

male\_OSp6m

\_\_\_\_\_

The total number of anal sex partners cannot be more than the total number of male sex partners ([%%45:During the last %%]).

=====

Partner metadata screen 3 – p6m

=====

*If >1 male AI partner:*

**121** Of your [%%49:Of the [%% %%] partners you had anal sex with in the last 6 months, how many did you have unprotected anal sex with? (This means that you or your partner did not use a condom at any point during sex, at least one time that you had anal sex).

\_\_\_\_\_

males\_UAIp6m

*ERROR: The number of male partners you had unprotected anal sex with can't be more than the total number of anal sex partners ([%%49:Of the [%% %%]).*

*If 1 male AI partner:*

**122** In the last 6 months, did you have unprotected anal sex with your male anal sex partner? (This means that you or your partner did not use a condom at any point during sex, at least one time that you had anal sex)

- ☐ Yes
- ☐ No
- ☐ Don't know

male\_UAIp6m

=====

Intro partner list

=====

This next section will be about some of your recent sex partners, regardless of gender.

In order to do that, we will ask you to provide nicknames for your recent sex partners. We will then use these nicknames to customize the questions so that they are specific to your partners.

It is important that you choose a nickname that will best help you remember the person. The names you provide are meant to help you only and should not reveal your partner's full identity. We do not want to know who your partners actually are.

Some examples of nicknames that you might choose are: a partner's first name, a nickname you call the partner by, the place where you both met or an online screen name.



=====

Partner name list

=====

Please give a nickname for each of your most recent sex partners over the last 6 months (since the beginning of [%%432:month\_5 %%]).

Male, female, and transgender sex partners may be in this list:

For male partners, we mean people you had oral or anal sex with.

For female partners, we mean people you had vaginal, or anal sex with.

**123** Space for 5 partners is provided, but you only need to fill in as many spaces as you need or can remember.

If you had more than 5 sex partners in the previous 6 months, we would like nicknames for the most recent 5.

Partner 1 (most recent) \_\_\_\_\_

Partner 2 \_\_\_\_\_

Partner 3 \_\_\_\_\_

Partner 4 \_\_\_\_\_

Partner 5 \_\_\_\_\_

p1

p2

p3

p4

p5

name\_count

=====

Partner calendar

=====

**124** For each sex partner listed, indicate, each month you had sex with that partner

*Calendar created as follows:*

*Each names partner has a row*

*Each of the last 6 months is provided in a column*

*Response is required in each row*

|                  | <b>Oct '09</b> | <b>Nov '09</b> | <b>Dec '09</b> | <b>Jan '10</b> | <b>Feb '10</b> | <b>Mar '10</b> |
|------------------|----------------|----------------|----------------|----------------|----------------|----------------|
| <Partner_name_1> | [ ]            | [ ]            | [ ]            | [ ]            | [ ]            | [ ]            |
| <Partner_name_2> | [ ]            | [ ]            | [ ]            | [ ]            | [ ]            | [ ]            |
| <Partner_name_3> | [ ]            | [ ]            | [ ]            | [ ]            | [ ]            | [ ]            |
| <Partner_name_4> | [ ]            | [ ]            | [ ]            | [ ]            | [ ]            | [ ]            |
| <Partner_name_5> | [ ]            | [ ]            | [ ]            | [ ]            | [ ]            | [ ]            |

p1m5, p1m4, p1m3....p2m5, p2m4...etc.

*If there are no ambiguous partnerships with one-month overlaps:*

=====

Proceed to partnership-specific questions

=====

Thank you for telling us the months in which you had sex with your partners.

Click Next to continue

*skip to “Intro. to partner-specific questions”*

*If there are ambiguous partnerships with one-month overlaps:*

=====

Proceed to concurrency clarification questions

=====

Thank you for telling us the months in which you had sex with your partners.

The next page will ask some questions to help us better understand what you just told us about your sexual partnerships.

Click Next to continue

=====

Concurrency clarification questions

=====

*For each ambiguous partnership that has a one-month overlap, this question is provided:*

You indicated that you had sex with both [partner X] and [partner Y] in the month of [Month Z].

**125** Which of these statements about [Month Z] is most correct?

concurrency\_clarify

- 1 I last had sex with [partner X] before I had sex with [partner Y]
- 2 I last had sex with [partner Y] before I had sex with [partner X]
- 3 I was having sex with both [partner X] and [partner Y] during the same time period
- 9? Don't know

=====

Intro. to partner-specific questions

=====

On the next pages, we would like to ask you some questions about the sex partners for whom you gave nicknames.

For each partner you named, you will be asked similar questions. Some questions will be about the partner in general and some will be about your relationship with the partner.

The first questions will be about [%%403\_O0:Space for 10&nb %%].

Click Next Page to begin.

=====

Partner Demographics: #1

=====

**201** Is [%%454:cur\_partner\_nam %] male, female, or transgender?

- 1 Male
- 2 Female
- 3 Transgender: male to female
- 4 Transgender: female to male

genderp1

**202** What is [%%454:cur\_partner\_nam %]'s current age?

(if you are unsure of the exact age, choose an age that you think is close)

agep1

if #202=don't know then #203

If "don't know"

**203** Which of the following statements about [%%454:cur\_partner\_nam %]'s age is most true?

- 1 He or she is more than 10 years <u>younger</u> than I am
- 2 He or she is 2-10 years <u>younger</u> than I am
- 3 He or she is within a year of my age
- 4 He or she is 2-10 years <u>older</u> than I am
- 5 He or she is more than 10 years <u>older</u> than I am
- 9 Don't know

agestatementp1

**204** Is [%%454:cur\_partner\_nam %] Hispanic?

- 1 Yes
- 0 No
- 9 Don't know

hispanicp1

**205** What race is [%%454:cur\_partner\_nam %]? (check one)

- 1 ( ) Asian/Pacific Islander
- 2 ( ) Black/African-American
- 3 ( ) White/Caucasian
- 4 ( ) Native American/Alaska Native
- 5 ( ) Mixed Race
- 6 ( ) Other
- 9 ( ) Don't know

racep1

racep1N5

If "mixed race"

**206** You indicated that [%%454:cur\_partner\_nam %] is of mixed race. Which terms best describe [%%454:cur\_partner\_nam %]?

- 1 Asian/Pacific Islander
- 2 Black/African American
- 3 White/Caucasian
- 4 American Indian/Alaskan Native
- 6 Other

asian\_p1  
black\_p1  
white\_p1  
native\_p1  
other\_p1

**207** Has [%%454:cur\_partner\_nam %] had a paid job before?

- 1 Yes
- 2 No
- 9 Don't know

paidjob\_p1

If "Yes"

if #207=yes, then #208  
if #207=no, then #209  
if don't know, then #208

**208** How would you describe [%%454:cur\_partner\_nam %%]'s current work situation?

(Check all that apply)

- 1 ( ) Full time paid job (>30 hours/week)
- 2 ( ) Part time paid job (<30 hours/week)
- 3 ( ) Home duties/child care
- 4 ( ) Full time student
- 5 ( ) Part time student
- 6 ( ) Voluntary/charitable work
- 7 ( ) Have a job, but not at work due to extended illness, family leave, furlough or strike
- 8 ( ) Disabled
- 9 ( ) Unemployed for less than one year
- 10 ( ) Unemployed for more than one year
- 99 ( ) Don't know

work\_fulljob\_p1  
work\_part\_p1  
work\_home\_p1  
work\_fullstu\_p1  
work\_pstu\_p1  
work\_volunt\_p1

if fulltime then #210  
if parttime then #210

if illness then #210  
if disabled then #210  
if unemployed less 1yr then #210  
if unemployed more 1yr then #210

work\_leave\_p1

work\_disabled\_p1  
work\_less1yr\_p1  
work\_more1yr\_p1  
work\_dontknow\_p1

**210** What kind of work does or did [%%454:cur\_partner\_nam %%] do on his/her last main job?

mainjobp1

**209** *If "no"*

How would you describe [%%454:cur\_partner\_nam %%]'s current work situation?

(Check all that apply)

- 3 Home duties/child care
- 4 Full time student
- 5 Part time student
- 6 Voluntary/charitable work
- 7 Disabled
- 8 Unemployed for less than one year
- 9 Unemployed for more than one year
- 99 Don't know

nopay\_home\_p1  
nopay\_fullstu\_p1  
nopay\_pstu\_p1  
nopay\_volunt\_p1  
nopay\_disabled\_p1  
nopay\_less1yr\_p1  
nopay\_more1yr\_p1  
nopay\_dontknow\_p1

**211** In the last 6 months (since the beginning of [%%432:month\_5 %%]), has [%%454:cur\_partner\_nam %%] been arrested?

- 1 Yes
- 0 No
- 9 Don't know

if yes=#212

arrestP1

*If 'yes':*

**212** How many days did [%%454:cur\_partner\_nam %%] spend in jail or prison the last time [%%454:cur\_partner\_nam %%] was held?

- 1 Under 30 days
- 0 Over 30 days
- 9 Don't know

daysjailP1

=====

Partnership description: #1

=====

Please tell us a little about **you and [%%454:cur\_partner\_nam %%]**

**213** Did you have sex with [%%454:cur\_partner\_nam %%] once, or more than once during the last 6 months?

0 ( ) Once

1 ( ) More than once

**REQUIRED**

if once=#216

if more than once=#214

morethanonceP1

*If 'more than once', then ask: (one-time partners automatically casual)*

**214** Is/was [%%454:cur\_partner\_nam %%] someone that you feel or felt committed to above all others (someone you might call your boyfriend, significant other, life partner, or husband)?

0 ( ) Yes

1 ( ) No

9 ( ) Don't know

**REQUIRED**

if #95,#97,#99,#101=yes, then #215

if #95,#97,#99,#101=no or 9, then #216

mainP1

*If 'partner classification and numbers' section above reveals exchange partners, then ask:*

**215** 72. Is/was [%%454:cur\_partner\_nam %%] an exchange partner (someone who you have sex with in exchange for money, drugs, food, or something else of value)?

0 ( ) Yes

1 ( ) No

9 ( ) Don't know

**REQUIRED**

exchangeP1

**216** If you had to further describe the type of sex partner [%%454:cur\_partner\_nam %%] is/was, which of the following would you choose?

gorbachP1

Someone who ...

( ) ... is your primary sexual partner

( ) ... you have sex with on a regular basis, <i>but who is not your main or primary partner</i>

( ) ... you have had sexual contact with more than once, <i>but not on a regular basis</i>, and who you normally

socialize with

( ) ... you have had sexual contact with more than once, <i>but not on a regular basis</i>, and who you don't

socialize with

( ) ... you had sexual contact with only 1 time, but could find again if necessary

( ) ... you had never met before you had had sexual contact and never plan to see again

( ) ... you gave sex to for money or other goods or someone who gave you sex for money or other goods

**217** Please rate the strength of your relationship with [%%454:cur\_partner\_nam %%] on a scale from 1 (weak) to 10 (strong):

1 1 (very weak)

2 2

3 3

4 4

5 5

6 6

7 7

8 8

9 9

10 10 (very strong)

relstrengthp1



=====  
Geography: #1  
=====

**218** Where did you first meet [%%454:cur\_partner\_name %']? 1

**wheremeetP1 – P5**

**wheremeetP1**

- 2
- 3 ( ) Through friends
- 4 ( ) School or work
- 5 ( ) Circuit party or Rave
- 6 ( ) At church
- 7 ( ) Online
- 8 ( ) Through a personal ad in a newspaper
- 9 ( ) On a telephone chat line or dating line
- 10 ( ) Bar/Club
- 11 ( ) Cruising area
- 12 ( ) On the street
- 13 ( ) Adult bookstore
- 14 ( ) Bath house
- 15 ( ) Sex club
- 16 ( ) Sex resort
- 17 ( ) Private sex party
- 18 ( ) Sports club or gym
- 19 ( ) Vacation or cruise
- 20 ( ) Social organization
- 20 ( ) Other **wheremeet\_P118**

**219** *if "Internet" ...*

Through which online service did you first meet [%%454:cur\_partner\_name %']? 1

**onlineservice P1**

- 2 ( ) MySpace
- 3 ( ) Facebook
- 4 ( ) Craigslist
- 5 ( ) Adam4Adam
- 6 ( ) Manhunt
- 7 ( ) D-list
- 8 ( ) FindFred
- 9 ( ) Friendster
- 10 ( ) Grindr
- 20 ( ) Other, *please specify:* \_\_\_\_\_ **onlineservice P1N9**

**onlineserviceP1 – P5**

*if the partnership type was not "anonymous" (SG note: done in script):*

**220** Did you and [%%454:cur\_partner\_name %'] live together at any point during the last 6 months (since the beginning of [%%432:month\_5 %'])?

- 1 Yes
- 0 No

**livetogetherp1**

**livetogetherP1 – P5**

if #213=yes, then phrasing 1  
if #213=no, then phrasing 2

=====

Disclosure of status

=====

**221** *if had sex “more than once” above:*

Did you and [%%454:cur\_partner\_nam %%] share both of your HIV statuses before you first had sex?

*if had sex “once” above:*

Did you and [%%454:cur\_partner\_nam %%] share both of your HIV statuses before you had sex?

1 ( ) Yes

0 ( ) No

9 ( ) Don't know

**discussstatusfsP1 – P5**

*if yes then #222*

**discussstatusfsP1**

**222** *If ‘yes’ to discussing status:*

What was [%%454:cur\_partner\_nam %%]'s status at that time?

1 HIV-negative

0 HIV-positive

9 Don't know

**status: 1 – P5**

*if pos or neg, then #223*

*if don't know, then #225*

**statusfsP1**

*If participant and his partner discussed their HIV statuses and partner was positive or negative, this page is shown. Otherwise skipped to next page:*

=====  
Serosorting intent  
=====

**223** *if had sex “more than once” above:*

statusimpP1

How important was the knowledge that [%%454:cur\_partner\_nam %%] was [partner's HIV status] in deciding to first have sex with [%%454:cur\_partner\_nam %%]?%

*if had sex “once” above:*

How important was the knowledge that [%%454:cur\_partner\_nam %%] was [partner's HIV status] in deciding to have sex with [%%454:cur\_partner\_nam %%]?%

- 1 | Not important at all
- 2 | Slightly important
- 3 | Moderately important
- 4 | Very important
- 5 | Extremely important

**statusimpP1 – P5**

**224** *Online involveMENT pilot only. Done for ONLY first partner: if answers the above question:*

We are trying to develop new questions to help understand the decisions that men make when choosing their sex partners.

Was this question clear to you? **statisimpclearP1**

- 1 Yes
- 0 No, please explain and feel free to offer any suggestions: \_\_\_\_\_

**statusimpclearP1**

if #213=once, then #234  
if #213=more than once, then #225

*[If had sex “more than once”, then the participant next completes the sections pertaining to dates of first and last sex].  
[If had sex “once”, then the participant is skipped to the “Ongoing relationship” section”].*

=====

Date of first sex: #1

=====

76. When did you first have sex with [%%454:cur\_partner\_nam %%]?

You may enter just the month and year, but if you know the exact date, please enter that instead.

If you are unsure of when you first had sex, try to select a time that you think is close.

It is OK if you first had sex with [%%454:cur\_partner\_nam %%] longer than 6 months ago; we still would like to know when you first had sex.

225

(drop-down box with months. “don’t know the month” is provided as option) **firstsexmoP1**

226

(drop-down box with years) “don’t know the year” is provided as option) **firstsexyrP1**

firstsexmoP1

firstsexyrp1

OR

227

MM/DD/YYYY (calendar button) **firstsexdtP1**

firstsexdtP1

*[ERROR: The time you first had sex with [%%454:cur\_partner\_nam %%] cannot be in the future. Please correct the date.]*

*[ERROR: Please select either the month and year OR the date you first had sex with [%%454:cur\_partner\_nam %%]]*

if don't know then #228,#229

Completed only for non-one-time partners

=====

Date of first sex – unknown month or year: #1

=====

**228** if year is selected as “don’t know the year”

**firstsexyearsP1**

It's OK if you can't remember the exact year.

Can you remember about how many years ago you first had sex with [%%454:cur\_partner\_nam %%]?

- 1 Less than 1 year ago
- 2 1 – 2 years ago
- 3 2 – 5 years ago
- 4 5 – 10 years ago
- 5 more than 10 years ago

**firstsexyearsP1 – P5**  
**(REQ)**

**229** if month is selected as “don’t know the month” (but year is known)

It's OK if you can't remember the exact month.

Think back to the time in [Year of first sex] when you first had sex with [%%454:cur\_partner\_nam %%].

Perhaps you had sex around a special time of the year such as your birthday, or a holiday like July 4th or Halloween. Maybe you can remember that it was warm outside or it was after a trip you took.

Based on what you can recall, try to select what time during [Year of first sex] you first had sex with [%%454:cur\_partner\_nam %%]:

- 1 January - March
- 2 April - June
- 3 July - September
- 4 October - December
- 9 (don't know when during the year)

**firstsexmonthsP1**

*[ERROR: The time during the year you indicated for when you first had sex with [%%454:cur\_partner\_nam %%] is in the future. Please correct this.]*

**firstsexmonthsP1 – P5**  
**(REQ)**

*[ERROR: The date you gave for the last time you had sex with [%%454:cur\_partner\_nam %%] comes before the time you first had sex with [%%454:cur\_partner\_nam %%] . Please correct this date.]*

*[ERROR: The month you gave for the last time you had sex with [%%453:cur\_partner\_num %%] comes before when you first had sex with [%%453:cur\_partner\_num %%] . Please correct this.]*

*[ERROR: The time period you gave for the last time you had sex with [%%453:cur\_partner\_num %%] comes before when you first had sex with [%%453:cur\_partner\_num %%] . Please correct this.]*

Completed only for non-one-time partners

=====

Date of last sex: #1

=====

Month of last sex is captured from partnership calendar in a hidden variable.

**230** Earlier, you indicated that you last had sex with [%%454:cur\_partner\_nam %%] in the month of [month of last sex from calendar]. Is this correct?

- 1 Yes  
0 No

lastsexmocorrectP1

if no then #234

**lastsexmocorrectP1 – P5**  
**(REQ)**

**231** If 'Yes'

Do you know the exact date on which you last had sex with [%%454:cur\_partner\_nam %%]?

- 1 Yes  
0 No

if yes then #232

if no then #233

lastsexknowdtP1

**lastsexknowdtP1 – P5**  
**(REQ)**

**232**

If 'Yes'

Please enter the date:  
MM/DD/YYYY (calendar button)

**lastsexdtP1 – P5**  
**(REQ)**

lastsexdtP1

If 'No'

That's OK. The information that you have provided us with is still extremely helpful.

End of page. Participant clicks 'Next'

**233** If 'No'

That's OK. Please correct our records about when you last had sex with [%%454:cur\_partner\_nam %%] using the spaces below.

lastsexmoP1

You may pick one of the last 6 months, but if you know the exact date, please enter that instead.  
If you are unsure of when you last had sex, try to select a time that you think might be close.

(drop-down box with the last 6 months. "don't know the month" is now not provided as option)

**lastsexmoP1 – P5**

OR

same date field as above:

MM/DD/YYYY (calendar button)

**lastsexdtP1**  
**(one of the two fields is REQ)**

[ERROR: The date you last had sex with [%%454:cur\_partner\_nam %%] cannot be in the future. Please correct the date.]

[ERROR: Please select either the month and year OR the date you last had sex with [%%454:cur\_partner\_nam %%]]

[ERROR: The date you gave for the last time you had sex with [%%454:cur\_partner\_nam %%] is more than 6 months ago (before [%%432:month\_5 %%]). Please correct the date.]

*if the partnership type was not "anonymous"*

=====

Ongoing Relationship: #1

=====

**234** Do you think you will have sex with [%%454:cur\_partner\_nam %%] again?

- 1 Yes
- 0 No
- 9 Not sure

ongoingp1

***ongoingP1 – P5***

if #93=mtf or ftm, then #235

*If partner is either transgender type:*

=====  
Transgender partner anatomy: #1  
=====

You indicated that [%%454:cur\_partner\_nam %%] is transgender.

**235** Does [%%454:cur\_partner\_nam %%] have a penis?

- 1** Yes
- 0** No
- 9** Don't know

**haspenisP1**

**haspenisP1 – P5**

(if #235=no) or (#93=mtf or ftm and #235=don't know=#240)  
if #213=more than once, then #236  
If #213=once, then #236



*[If had sex “once, the participant is skipped to the “Group sex” page]  
 [If had sex “more than once” and the partner is male or transgender & has a penis, then the participant completes this section].*

=====

Sex frequency – male partner, or transgender partner with penis: #1

=====

Now we'd like to ask you a few questions your relationship with [%%454:cur\_partner\_nam %%] in the last six months  
 (since the beginning of [%%432:month\_5 %%]).

**236** In the last six months, how many times have you had anal or oral sex with [%%454:cur\_partner\_nam %%]?

*[Pull-down menu of choices:]*

- 1 1
- 2 2
- 3 3
- 4 4
- 5 5
- 6 6
- 7 7
- 8 8
- 9 9
- 10 10
- 9 More than 10 (coded as 50)
- 10 **xfreqmpP1 – P5**

sexfreqmpP1

if 50, then #237

*If “mc” an 10 times”*

**237** About how often did you have anal or oral sex with [%%454:cur\_partner\_nam %%] in the last six months?

- 1 About once a month
- 2 2 or 3 times a month
- 3 About once a week
- 4 2 or 3 times a week
- 5 More than 3 times a week
- 5 **xfreqoftenmpP1 – P5**

sexfreqoftenp1

**238** Have you had anal sex with [%%454:cur\_partner\_nam %%] in the last 6 months?

- 1 Yes
- 0 No
- 9 Don't know
- 9 **!mpP1 - P5**

AImpP1

if yes, then #239

if no, then #240

**239** *If ‘yes’*

Have you had unprotected anal sex with [%%454:cur\_partner\_nam %%] in the last 6 months? *(This means that you or [%%454:cur\_partner\_nam %%] did not use a condom at any point during sex, at least one time that you had anal sex.)*

- 1 Yes
- 2 No
- 9 Don't know
- 9 **!mpP1 - P5**

UAImpP1

*[If had sex “more than once” and the partner is female or is transgender and has no penis (or “don’t know” to having a penis), then the participant completes this section].*

=====

Sex frequency – female partner, or transgender partner without penis: #1

=====

Now we’d like to ask you a few questions about your relationship with NAME in the last six months (since the beginning of [%%432:month\_5 %%])

**240** In the last six months, how many times have you had vaginal or anal sex with [%%454:cur\_partner\_nam %%]?

*[Pull-down menu of choices:]*

- 1 ) 1
- 2 ) 2
- 3 ) 3
- 4 ) 4
- 5 ) 5
- 6 ) 6
- 7 ) 7
- 8 ) 8
- 9 ) 9
- 10 ) 10
- 9 ) More than 10 (coded as 50)
- 10 **exfreqfpP1 – P5**

sexfreqfpP1

if 50, then #241

50

*If “more than 10 times”*

**241** About how often did you have vaginal or anal sex with [%%454:cur\_partner\_nam %%] in the last six months?

- 1 About once a month
- 2 2 or 3 times a month
- 3 About once a week
- 4 2 or 3 times a week
- 5 More than 3 times a week
- 5 **xfreqoftenfpP1 – P5**

sexfreqoftenfpP1

**242** Have you had vaginal sex with [%%454:cur\_partner\_nam %%] in the last 6 months?

- 1 Yes
- 2 No
- 9 Don't know
- 9 **ImpP1 – P5**

VIfpP1

if yes then #243

if no or don't know then #244

**243** *If ‘yes’*

Have you had unprotected vaginal sex with [%%454:cur\_partner\_nam %%] in the last 6 months? (This means that you or [%%454:cur\_partner\_nam %%] did not use a condom at any point during sex, at least one time that you had vaginal sex.)

- 1 Yes
- 2 No
- 9 Don't know
- 9 **VImpP1 – P5**

vUVImpP1

**244** Have you had anal sex with [%%454:cur\_partner\_nam %%] in the last 6 months?

- 1 Yes
- 2 No
- 9 Don't know
- 9 **mpP1 – P5**

ALfpP1

**245** *If ‘yes’*

Have you had unprotected anal sex with [%%454:cur\_partner\_nam %%] in the last 6 months? (This means that you or [%%454:cur\_partner\_nam %%] did not use a condom at any point during sex, at least one time that you had anal sex.)

UAIfpP1

- 1 Yes
- 2 No
- 9 Don't know

**AlmpP1 - P5**

[only completed if sex more than once]

=====

Sexual agreements / negotiated safety: #1

=====

**246** What is the most recent agreement you and [%%454:cur\_partner\_nam %%] have/had about sexual encounters outside of your relationship? (Please choose only one.)

- 1 Both of us cannot have any sex with an outside partner.
- 2 We can have sex with outside partners, without any conditions or restrictions.
- 3 We can have sex with outside partners, but with some conditions or restrictions.
- 4 We do not have an agreement.

agreementP1

agreementP1 – P5

if #246=1 or 2, then #248

if #246=3 or 4, then #250

*if had an agreement that permits outside partners (choices 2 and 3):*

**247** Does/did your agreement permit unprotected (i.e. without a condom) receptive (bottom) or insertive (top) anal sex with outside partners?

- 1 Yes
- 0 No

agreementUAIP1

agreementUAIP1 – P5

*if had an agreement (first 3 choices):*

**248** How long were you in a relationship with [%%454:cur\_partner\_nam %%] before you made your most recent agreement?

- 1 0-5 months
- 2 6-11 months
- 3 1-2 years
- 4 3-4 years
- 5 More than 4 years
- 5 Don't Know
- 9

agreementYearsP1

reementYearsP1 – P5

**249** Did you and [%%454:cur\_partner\_nam %%] explicitly or directly discuss your most recent agreement?

- 1 Yes
- 0 No

agreementdiscussP1

agreementDiscussP1 - P5

[only completed if sex more than once]

=====

Sexual activity outside of this relationship: #1

=====

**250** In the last 6 months, during the time when you were sexually involved with [%%454:cur\_partner\_nam %%], with how many other people did you have sex?

othersexparticipantP1

othersexparticipantP1- P5

**251** In the last 6 months, during the time you were sexually involved with [%%454:cur\_partner\_nam %%], did [%%454:cur\_partner\_nam %%] have sex with anyone else?

1 Yes

0 No

9 Don't know

othersexpartnerP1

othersexpartnerP1- P5

=====  
Group sex: #1  
=====

**252** In the last 6 months (since *[current month - 6]*), did you and [%%454:cur\_partner\_nam %%] ever have sex with other people at the same time? (Threesome or group sex)

1 Yes

0 No

9 Don't know

groupsexP1

**groupsexP1 – P5**

=====

STD diagnosis and treatment in p6m

=====

**253** Was [%%454:cur\_partner\_nam %%] diagnosed with an STD in the last 6 months (since the beginning of [%%432:month\_5 %%])?

- 1 Yes
  - 0 No
  - 9 Don't know
- stdxP1 – P5**

**stdxP1**

if yes, then #254  
if no, then #255  
if #235=yes, then #254

*If 'yes'*

**254** Was [%%454:cur\_partner\_nam %%] treated for that STD in the last 6 months?

- 1 Yes
  - 0 No
  - 9 Don't know
- stdtrtP1 – P5**

**stdtrtP1**

[If partner is male or is transgender and has a penis, then this section is completed]  
[Otherwise, the next section is completed]

if #235=no, then #261

=====

Last sex – sexual activities – male partner, or transgender partner with penis: #1

=====

[If had sex “once”, then the phrase “The last time” is replaced with “When”]

**255** The last time you had sex with [%%454:cur\_partner\_nam %%], did you have receptive anal sex? (This means that you were the bottom)

- 1 Yes
- 0 No
- 9 Don't know
- 9 *Ilsp1 – P5*

RAIlsp1

If ‘yes’

**256** Did [%%454:cur\_partner\_nam %%] use a condom the last time you had receptive anal sex (when you were the bottom)?

- 1 [%%454:cur\_partner\_nam %%] did not use a condom 1
- 2 [%%454:cur\_partner\_nam %%] used a condom part of the time 2
- 3 [%%454:cur\_partner\_nam %%] used a condom the whole time 3
- 4 [%%454:cur\_partner\_nam %%] used a condom, but it broke 4
- 9 Don't know 9
- 9 *IlsccondomP1 – P5*

RAIlsccondomP1

If “did not use a condom”:

**257** What was the main reason why a condom was not used the last time you had receptive anal sex with [%%454:cur\_partner\_nam %%]?

- 1 A condom wasn't available. 1
- 2 A condom was available, but I didn't want to use one. 2
- 3 A condom was available, but [%%454:cur\_partner\_nam %%] didn't want to use one. 3
- 4 Other reason, please specify: \_\_\_\_\_ 4
- 4 *whynoRAIlsccondomP1 – P5*

whynoRAIlsccondomP1

whynoRAIlsccondomP1N3

**258** The last time you had sex with [%%454:cur\_partner\_nam %%], did you have insertive anal sex? (This means that you were the top).

- 1 Yes
- 0 No
- 9 Don't know
- 9 *Ilsp1 – P5*

IAIsp1

If ‘yes’

**259** Did you use a condom the last time you had insertive anal sex with [%%454:cur\_partner\_nam %%] (when you were the top)?

- 1 I did not use a condom 1
- 2 I used a condom part of the time 2
- 3 I used a condom the whole time 3
- 4 I used a condom, but it broke 4
- 9 Don't know 9
- 9 *IlsccondomP1 – P5*

IAIsccondomP1

If “did not use a condom”:

**260** What was the main reason why a condom was not used the last time you had insertive anal sex with [%%454:cur\_partner\_nam %%]?

- 1 A condom wasn't available. 1
- 2 A condom was available, but I didn't want to use one. 2
- 3 A condom was available, but [%%454:cur\_partner\_nam %%] didn't want to use one. 3
- 4 Other reason, please specify: \_\_\_\_\_ 4
- 4 *whynoIAIsccondomP1 – P5*

whynoIAIsccondomP1

whynoIAIsccondomP1N3



=====  
Last sex – sexual activities – female partner, or transgender partner without penis: #1  
=====

*[If had sex “once”, then the phrase “The last time” is replaced with “When”]*

**261** The last time you had sex with [%%454:cur\_partner\_nam %%], did you have vaginal sex?

1 Yes

0 No

9 Don't know

IsP1 – P5

if yes, then #262

if no/dk, then #264

VIsP1

*If ‘yes’*

**262** Did you use a condom the last time you had vaginal sex?

Choose one.

1 I did not use a condom

2 I used a condom part of the time

3 I used a condom the whole time

4 I used a condom, but it broke

9 Don't Know

IscondomP1 – P5

VIscondomP1

if #262=1 (no condom), then #263

if #262=2,3,4,9, then #264

*If “did not use a condom”:*

**263** What was the main reason why a condom was not used the last time you had anal sex with [%%454:cur\_partner\_nam %%]?

1 A condom wasn't available. 1

2 A condom was available, but I didn't want to use one. 2

3 A condom was available, but [%%454:cur\_partner\_nam %%] didn't want to use one. 3

4 Other reason, please specify: \_\_\_\_\_ 4

ynovIscondomP1 – P5

whynoVIscondomP1

whynoVIscondomP1N3

**264** The last time you had sex with [%%454:cur\_partner\_nam %%], did you have anal sex?

1 Yes

0 No

9 Don't know

IsfpP1 – P5

AllsfpP1

*If ‘yes’*

**265** Did you use a condom the last time you had anal sex with [%%454:cur\_partner\_nam %%]?

Choose one.

1 I did not use a condom

2 I used a condom part of the time

3 I used a condom the whole time

4 I used a condom, but it broke

9 Don't Know

IsfpcondomP1 – P5

AllsfpcondomP1

if #265=1, then #266

if #265=2,3,4,9, then #267

*If “did not use a condom”:*

**266** What was the main reason why a condom was not used the last time you had anal sex with [%%454:cur\_partner\_nam %%]?

1 A condom wasn't available. 1

2 A condom was available, but I didn't want to use one. 2

3 A condom was available, but [%%454:cur\_partner\_nam %%] didn't want to use one. 3

4 Other reason, please specify: \_\_\_\_\_ 4

ynovAllsfpcondomP1 – P5

whynoAllsfpcondomP1

AllsfpcondomP1N3

=====  
Last sex – circumstances: #1  
=====

*[If had sex “once”, then the phrase “The last time” is replaced with “When”]*

We’d next like to ask some questions about the situation in which you and [%%454:cur\_partner\_nam %%] last had sex.

**267** Where were you and [%%454:cur\_partner\_nam %%] the last time you had sex?

- 1 My home 1
- 2 [%%454:cur\_partner\_nam %%]’s home 2
- 3 Bath house 3
- 4 Sex club 4
- 5 Sex resort 5
- 6 On vacation in a different city 6
- 7 Local hotel room 7
- 8 Circuit party or rave 8
- 9 Public restroom 9
- 10 Park 10
- 11 Car 11
- 20 Other, please specify \_\_\_\_\_ 20
- 11 **locationIsP1 – P5**
- 20

locationIsP1

locationIsP1N11

**268** The last time you had sex with [%%454:cur\_partner\_nam %%], were you buzzed on alcohol?

- 1 Yes
- 0 No
- 9 Don’t know
- 9 **alcoholIsP1 – P5**

alcoholIsP1

**269** The last time you had sex with [%%454:cur\_partner\_nam %%], were you high on drugs?

- 1 Yes
- 0 No
- 9 Don’t know
- 9 **drugIsP1 – P5**

drugIsP1

if #269=1, then #270

**270** *If ‘yes’:*

You indicated that you were high on a drug.  
Please indicate which ones:  
(Select all that apply)

- 1 Amphetamine, meth, speed, crystal, crank, ice - *not injected* 1
- 2 Amphetamine, meth, speed, crystal, crank, ice – *injected* 2
- 3 Downers (Valium, Ativan, Xanax) 3
- 4 Pain killers (Oxycontin, Percocet) 4
- 5 Hallucinogens such as LSD 5
- 6 Ecstasy 6
- 7 Club drugs such as GHB, ketamine 7
- 8 Marijuana 8
- 9 Poppers (amyl nitrite) 9
- 10 Crack - *not injected* 10
- 11 Crack – *injected* 11
- 12 Cocaine - *smoked or snorted* 12
- 13 Cocaine – *injected with no other drugs* 13
- 14 Heroin, *smoked or snorted but not injected* 14
- 15 Heroin - *injected with no other drugs* 15
- 16 Heroin and cocaine - *injected together (speedballs)* 16
- 14
- 15 Other drugs: \_\_\_\_\_ 50
- 16 **whichaIsP1 – P5**
- 50

Is\_meth\_noinject  
Is\_meth\_inject  
Is\_downers  
Is\_painkiller  
Is\_lsd  
Is\_x  
Is\_clubdrugs  
Is\_weed  
Is\_poppers  
Is\_crack\_noinject  
Is\_crack\_inject  
Is\_coke\_smoke  
Is\_coke\_inject  
Is\_heroin\_smoke  
Is\_heroin\_inject  
Is\_speedball  
Is\_otherdrug  
Is\_knowstatus

*[If had sex “once”, then the participant skips this page, since the answers provided in “Disclosure of status” apply to last sex]*

=====

Last sex – HIV status knowledge: #1

=====

- 271** The last time you had sex with [%%454:cur\_partner\_nam %%], did you know his/her HIV status?
- 1** Yes
- 0** No
- 9** Don't know
- HIVstatIsP1**
- VstatknowIsP1 - P5**

*If yes:*

- 272** What was [%%454:cur\_partner\_nam %%]'s HIV status at that time?
- ( ) HIV-negative      **“HIV-negative”**
- ( ) HIV-positive      **“HIV-positive”**
- HIVstatIsP1 – P5**
- HIVstatsourceIsP1**

*Skip if didn't know status at last sex*  
*Also skipped if sex once*

=====

Last sex – HIV status knowledge source

=====

**273** How did you know that [%%454:cur\_partner\_nam %%]'s was *[partner status]* when you last had sex?

**HIVstatsourcelsP1**

- 1** I already knew [%%454:cur\_partner\_nam %%] was *[partner status]* from previous contact with
- 2** %454:cur\_partner\_nam %%] **1**
- 3** I asked and [%%454:cur\_partner\_nam %%] told me **2**
- 4** [%%454:cur\_partner\_nam %%] volunteered the information **3**
- 4** I didn't ask, he didn't say, but I assumed [%%454:cur\_partner\_nam %%] was *[partner status]* **4**

**HIVstatsourcelsP1 – P5**

*[If the current partner is male, the two had UAI at last sex, then the participant completes this section].*  
*[Otherwise the participant is skipped to the next section]*

=====

Last sex – strategic positioning: #1

=====

*[If had sex “once”, then the phrase “When you last had sex” is replaced with “When you had sex”]*

**274** From what you’ve told us so far, when you last had sex with [%%454:cur\_partner\_nam %%], your HIV status was [participant’s HIV status] and [%%454:cur\_partner\_nam %%]’s HIV-status was [partner’s HIV status].

*if had unprotected receptive anal sex:*

When you last had sex, how important was this knowledge in deciding to have receptive anal sex (be a bottom) with [%%454:cur\_partner\_nam %%]?

- |   |                      |   |
|---|----------------------|---|
| 1 | Not important at all | 1 |
| 2 | Slightly important   | 2 |
| 3 | Moderately important | 3 |
| 4 | Very important       | 4 |
| 5 | Extremely important  | 5 |
- atposURAIIsP1 - P5*

stratposURA

*if had unprotected insertive anal sex:*

**275** When you last had sex, how important was this knowledge in deciding to have insertive anal sex (be a top) with [%%454:cur\_partner\_nam %%]?

- |   |                      |   |
|---|----------------------|---|
| 1 | Not important at all | 1 |
| 2 | Slightly important   | 2 |
| 3 | Moderately important | 3 |
| 4 | Very important       | 4 |
| 5 | Extremely important  | 5 |
- utposUIAIIsP1 - P5*

stratposUIAIIsP1

=====  
Partner transition: #1 to #2  
=====

Thank you for telling us about [%%403\_O0:Space for 10&nb %%].

Next, we'd like to ask you about [%%403\_O1:Space for 10&nb %%].

Click Next Page to continue.

**Partner 1 section replicated for partners 2-5, but excluded here for brevity.**

Relationships among partners (transitivity)

if 2 partner named:

276

Did [p #1] and [p #2] have sex with each other in the last 6 months, or do you think they probably have?

1

Yes

0

No

partners2sex

if >2 partners named:

277

If you know that two of these partners had sex with each other in the last 6 months, or think they probably have, click the box that matches both partners' nicknames on the grid.

which\_partners

|                       | [p #1] | [p #2] | [p #3] | [p #4] | [p #5] |
|-----------------------|--------|--------|--------|--------|--------|
| [partner #1 nickname] |        | [ ]    | [ ]    | [ ]    | [ ]    |
| [partner #2 nickname] |        |        | [ ]    | [ ]    | [ ]    |
| [partner #3 nickname] |        |        |        | [ ]    | [ ]    |
| [partner #4 nickname] |        |        |        |        | [ ]    |

**278** Have you ever taken medication to prevent getting HIV?

- 1 Yes
- 0 No
- 9 Don't know

arvprevent\_ever

**279** Are you currently taking this medication to prevent getting HIV?

- 1 Yes
- 0 No
- 9 Don't know

arvprevent\_current

**279** When did you first start taking this medication to prevent getting HIV?

Month:

-- Please Select --

arvprevent\_month

**280** Year:

-- Please Select --

arvprevent\_year

**281** When you take this medication, do you take it every day?

- 1 Yes
- 0 No
- 9 Don't know

arvprevent\_daily



**282** Do you take this medication: *(mark all that apply)*

- ☐ Before you have sex
- ☐ After you have sex
- ☐ Both before and after you have sex
- ☐ Other times, *please specify*:

Check = 1  
Unchecked = 0

arv\_beforesex  
arv\_aftersex  
arv\_beforeaftersex  
arv\_other

**283** Which medication(s) are you currently taking to prevent getting HIV?  
*Please type the name(s) of the medication:*

meds\_preventHIV

**284** People sometimes take this medication to prevent HIV infection from some recent past exposure to HIV or from some future potential exposure to HIV. Please tell us which reason(s) applies to why you are currently taking this medication:

- ☐ Exposure in the recent past
- ☐ Potential exposure in the future
- ☐ Both
- ☐ Other, *please specify*:

Check = 1  
Unchecked = 0

whyarv\_past  
whyarv\_future  
whyarv\_both  
whyarv\_other

---

**285** How did you get the medication you're currently taking to prevent getting HIV?  
*Select one response that applies the best:*

☐ By prescription from a doctor's office

☐ A friend or relative

☐ A partner you have sex with

☐ Don't know

☐ Some other place, *please specify:*

arv\_where

=====

Final screen

=====

Closing message for survey.

Instructions for telling staff that they have completed their Baseline survey.
